# Supplementary material for: Perturbed Lipidomic Profiles in Rats With Chronic Cerebral Ischemia Are Regulated by Xiao-Xu-Ming Decoction
Source: PubMed Central journal article supplement (PMC6433774; doi:10.3389/fphar.2019.00264), 2019-03-19
Supplement: Data_Sheet_1.pdf [file Data_Sheet_1.pdf]

# **Perturbed Lipidomic Profiles in Rats with Chronic Cerebral Ischemia Are Regulated by Xiao-Xu-Ming Decoction**

**Zhixin Jia <sup>a</sup>, Cai Tie <sup>a</sup>, Caihong Wang <sup>a</sup>, Caisheng Wu <sup>a</sup>, Jinlan Zhang <sup>a,\*</sup>**

*<sup>a</sup> State Key Laboratory of Bioactive Substance and Function of Natural Medicines, Institute of Materia Medica, Chinese Academy of Medical Sciences & Peking Union Medical College, No. 2 Nanwei Road, Xicheng District, Beijing 100050, China.*

\* Corresponding author. Phone: +8610-83154880 Fax: +8610-83154880

E-mail address: jessiejzx@163.com (Z. Jia), tiecai@imm.ac.cn (C. Tie), wangch@imm.ac.cn (C. Wang), wucsh@imm.ac.cn (C. Wu), zhjl@imm.ac.cn (J. Zhang).

## **S1 Text: The list of lipid standards**

Sphingolipids: Sph(d17: 1), Sph(d18: 1), Sph(d17: 1)-1-P, Sph(d18: 1)-1-P, Cer(d18: 1/2: 0), Cer(d18: 1/2: 0)-1-P, Cer(d18: 1/4: 0), Cer(d18: 1/6: 0), Cer(d18: 1/8: 0), Cer(d18: 1/8: 0)-1-P, Cer(d18: 1/10: 0), Cer(d18: 1/12: 0), Cer(d18: 1/12: 0)-1-P, Cer(d18: 1/14: 0), Cer(d18: 1/16: 0), Cer(d18: 1/18: 1), Cer(d17: 1/18: 0), Cer(d18: 1/18: 0), Cer(d18: 1/16: 0)-1-P, Cer(d18: 1/18: 1)-1-P, Cer(d18: 1/20: 0), Cer(d17: 1/24: 1), Cer(d18: 1/22: 0), Cer(d18: 1/24: 1), Cer(d18: 1/24: 0), HexSph(d18: 1), dhSph(d17: 0), dhSph(d18: 0), dhS1P(d17: 1), dhS1P(d18: 1), dhCer(d18: 0/2: 0), GlcCer(d18: 1/8: 0), dhCer(d18: 0/6: 0), dhCer(d18: 0/8: 0), HexCer(d18: 1/12: 0), HexCer(d18: 1/16: 0), Hex-Cer(d18: 1/18: 1), HexCer(d18: 1/18: 0), dhCer(d18: 0/16: 0), Cer(d17: 1/18: 0), dhCer(d18: 0/18: 1), dhCer(d18: 0/18: 0), HexCer(d18: 1/24: 1), Cer(d17: 1/24: 1), dhCer(d18: 0/24: 1), dhCer(d18: 0/24: 0). Other kinds of lipids: PS(16: 0/18: 1), PG(16: 0/18: 1), PC(10: 0), PE(16: 0/18: 1), PC(17: 0/20: 4), LPC(17: 1/0: 0), PS(17: 0/20: 4), PE(17: 0/20: 4), PI(17: 0/20: 4), d5-DG ISTD Mix II, d5-TG ISTD Mix I, SM17: 0, PC (18: 0/18: 0), DG(18: 0/18: 0), PS(12: 0/12: 0), PE(12: 0/12: 0).

All the lipid standards were bought from Avanti (Alabaster, AL, USA).

## **S2 Text: Quantification of lipids**

### **2.1 Preparation of standard solution**

#### **2.1.1 Sphingolipids**

##### a) Preparation of blank matrix

Exact 100 mg bovine serum albumin (BSA) was dissolved in normal saline in 10 mL volumetric flask. The solution was called blank matrix.

b) Preparation of internal standards

1). *For plasma analysis*: Mixed standard solution was prepared at a concentration of 1000 pmol/mL, marked for IS-P. 2). *For brain tissue analysis*: The mixed standards mentioned in 1) can be detected in brain tissue. Then, exogenous compounds should be used as internal standards. Derived fatty acids, which were kindly provided by Professor Cai Tie in our research group, were selected, marked as IS-B with a concentration of 2000 pmol/mL. The names of each standard were listed in Table S6.

c) Preparation of standard solutions

The stock solution was prepared at a concentration of 1000 pmol/mL. The names of standards were listed in Table S6. Proper amount of stock solution was added to make solutions with concentrations of 25, 50, 100, 200, 500, 1000, 2000 and 4000 pmol/mL separately. 100  $\mu$ L blank matrixes was added into glass tube, and then, mixed standard solution with different concentrations were added, too. 20  $\mu$ L internal standards were added into it, then with 1.5 mL methanol and 5 mL MTBE. The mixture was vortexed for 15 min, and then 1.5 mL deionized water was added with 10 min centrifugation at a speed of 4500 rpm for phase separation. The upper organic phase was transferred into another glass tube and the lower aqueous phase was extracted again. 2 mL second-extraction-liquid was added into the aqueous phase, vortex for 15 min, then with centrifugation at a speed of 4500 rpm for 10 min. The upper organic phase was combined and dried under nitrogen. 100  $\mu$ L methanol (with 0.1% FA, 1 mM ammonium formate) was used to dissolve.

d) Preparation of quality control (QC) samples

The solutions in “Preparation of standard solutions” with the concentration of 100,500, 2000 pmol/mL were the QC samples.

### **2.1.2 Other kinds of lipids**

#### a) Second-extraction-liquid

322.6mL MTBE, 96.8mL methanol and 80.6 mL water was added into separating funnel. After extraction, the mixture was placed under room temperature for 4 hours. Then the upper layer was the second-extraction-liquid.

#### b) Preparation of internal standard for extraction

Proper amount of lipids standards (listed in Table S6) were weighted and added into 2 mL volumetric flask and diluted with methanol. 2 mL of this solution was transferred to another 10 mL volumetric flask and diluted with methanol which contained 0.005% BHT. Then this solution was the internal standard for extraction, marked IS-E.

#### c) Preparation of internal standard for quantification

Proper amount of lipids standards (listed in Table S6) were weighted and added into 5 mL volumetric flask and diluted with chloroform which contained 0.005% BHT. This solution was the internal standard for quantification, marked IS-Q.

#### d) Preparation of quality control (QC) samples

The mixed lipid standards solution with the concentration of 1 nmol/mL was the QC samples.

## **2.2 The extraction of lipids**

The extraction was carried out by MTBE-MEOH-WATER three phase extract method (1).

100  $\mu$ L samples (plasma or brain tissue) was added into glass tube, and then 100  $\mu$ L IS-E, 20  $\mu$ L internal standards for sphingolipids (IS-P for plasma and IS-B for brain tissue), 1.5 mL methanol and 5 mL MTBE was also added. The mixture was vortexed for 15 min, and then 1.5 mL deionized water was added to lead phase separation. After centrifugation at a speed of 4500 rpm for 10 min, the upper organic phase was transferred into another glass tube. 2 mL second-extraction-liquid was added into the lower aqueous phase was. After vortex for 5 min and centrifugation at a speed of 4500 rpm for 10min, the upper organic phase was combined with that of the first time. 2 mL mixed liquid was dried under nitrogen, and then redissolved with 20  $\mu$ L methanol containing 0.1% FA and 1 mM ammonium formate. This part was for sphingolipids analysis. The rest part was dried under nitrogen, and then redissolved with 80  $\mu$ L IS-Q. This part was for analysis of other lipids.

## **2.3 Analysis with HPLC-MS/MS**

### **2.3.1 HPLC coupled with triple quadrupole MS**

**Chromatographic conditions:** Column: Peeke C8SR (150 $\times$ 3.0 mm, 3  $\mu$ m). Mobile phase: A water (containing 0.1%FA, 1 mM ammonium formate); B methanol (containing 0.1% FA, 1 mM ammonium format). Flow rate: 0.5mL/min. Column temperature: 40 $^{\circ}$ C. Gradient elution as following: 0-10 min, 80-100% B; 10-18 min, 100% B; 18-18.1min, 100-80% B; 18.1-25 min, 80% B.

**Mass spectrometry conditions:** Gas Temp: 350 $^{\circ}$ C; Gas Flow: 10 L/min; Nebulizer: 30 psi; Capillary: 4000 V. This method contained 6segments: 0-1.5 min, segment 1, to waste; 1.5-7 min, segment 2, to MS; 7-12 min, segment 3, to MS; 12-14 min, segment 4, to MS; 14-16 min,

segment 5, to MS; 16-25 min, segment 6, to MS. The compounds eluted around the boundary point ( $\pm 0.5$  min) of each segment were included in both segments. So, all compounds could be detected even if the retention time drifted. The details were listed in Table S3.

### **2.3.2 HPLC coupled with FTICRMS**

**Chromatographic conditions:** Column: Waters Xterra MS C8 (2.1 $\times$ 100mm, 3.5 $\mu$ m). Mobile phase: C, acetonitrile: isopropanol= 5: 2, v/v (containing 2mM ammonium acetate, 0.1% formic acid); D, 2 mM ammonium acetate, 0.1% formic acid aqueous solution. Gradient elution as following, 0-1 min 10%A, 1-2 min 10-30%A, 2-4 min 30-50%A, 4-8 min 50-70%A, 8-12 min 70-100%A, 12-24 min 100%A, 24-24.5 min 100-10%A, 24.5-30 min 10%A. Flow rate: 0.35mL/min. Column temperature: 40 $^{\circ}$ C. Injection volume: 10 $\mu$ L. Injection temperature: 4 $^{\circ}$ C. Needle washing: 3000  $\mu$ L methanol.

**MS conditions:** Ion source: ESI; Detection mode: positive; ion spray voltage: 4.5kV; sheath gas flow rate(N2): 50arb; auxiliary gas flow rate (N2): 20arb; sweep gas flow rate (N2): 3arb; capillary voltage: 35V; capillary temperature: 275 $^{\circ}$ C; Scan mode: FT Full Scan; range: m/z 50-1200 Da; resolution100, 000.

## **S3 Text: Metabolites identification after oral administration of XXMD**

### **3.1 Sample preparation**

**Plasma:** There were 3 samples in each time point (0.5h, 2.5h and 8h after oral administration) which were combined before protein precipitation. 2 mL mixture was taken into 15 mL centrifuge tube and 10 mL methanol was used to precipitate protein. After vortex for 30 s and centrifugation at a speed of 1721g for 10 min, the supernatant was dried under nitrogen and redissolved in 100

$\mu$ L methanol. The solution mentioned above was then centrifuged at a speed of 15493 g for 10 min and analyzed.

**Brain tissue:** 1 mL homogenate of the brain tissue was taken into 15 mL centrifuge tube and 5 mL methanol was used to precipitate protein. The remaining steps were the same as plasma samples.

### 3.2 HPLC coupled with MS/MS analysis

**Chromatographic conditions:** Colum: Thermo BDS HYPERSIL C18 column (150 $\times$ 2.1 mm, 3 mm). Mobile phase: aqueous solution, containing 0.1% formic acid (A); acetonitrile (B). Gradient elution as following: 0-5 min, A: 95-95%, B: 5-5%; 5-25 min, A: 95-70%, B: 5-30%; 25-35 min, A: 70-60%, B: 30-40%; 35-45 min, A: 60-20%, B: 40-80%; 45-50 min, A: 20-20%, B: 80-80%; 50-51 min, A: 20-95%, B: 80-5%; 51-60 min, A: 95%-95%, B: 5%-5%. Injection volume: 5  $\mu$ L; Column temperature: 30 $^{\circ}$ C; Flow rate: 0.2mL/min.

**Mass spectrometry conditions:** Ion source: ESI; Detection mode: positive; ion spray voltage: 4.0kV; sheath gas flow rate(N2): 40arb; auxiliary gas flow rate (N2) : 10arb; sweep gas flow rate (N2) : 3arb; capillary voltage: 40V; capillary temperature: 250 $^{\circ}$ C. Mass spectra data were recorded by full-scan mass analysis from  $m/z$  100 to 1500 at a resolving power of 50,000 with data-dependent MS<sup>2</sup> analysis triggered by the two most abundant ions from full-scan mass analysis, followed by MS<sup>3</sup> analysis of the most abundant ions of MS<sup>2</sup>. A repeat count of one prior to exclusion was utilized for dynamic exclusion, and the repeat duration was 10 seconds. The time of mass-to-charge value residing on the exclusion list (the list size was set to 50) was 30 s after the data-dependent MS<sup>2</sup> experiment. Collision-induced dissociation (CID) was conducted

with an isolation width of 1 Da. Xcalibur software (Version 2.0; Thermo Scientific) was used for data acquisition and reduction.

#### **S4 Text: The establishment and optimization of lipids quantification method**

##### **4.1 HPLC coupled with triple quadrupole MS**

In our previous study, the HPLC coupled with triple quadrupole MS methods for sphingolipids quantification have been established. 43 sphingolipids could be detected and quantified via these methods (2). In this study, these methods were optimized on the following two aspects: 1) Analysis time. Each sample should be analyzed for three times in the previous methods which consumed about 1 hour. So, we expected to restrict the analysis time into 30 minutes. 2) Detected compounds. Sphingomyelin (SM) had high abundance in biological samples, which could be detected via the FTICRMS method (3). Thus, this method could get rid of SM and take Sph, Cer, dhCer, Cer-1P, dhCer-1P and glucoceramide into consideration only. As a result, only one analysis cycle was needed. Besides, the former methods only contained compounds with standard substance, except two ion pairs. This time, we add more ion pairs with no standard substance to enrich the method which made the detection for biological samples more comprehensive.

To achieve good separation and profile the chemical components, different columns and elution programs were investigated. Such as, shiseido capcell pak C8 column, capcell pak C1 column, Waters C8 Sunfire column, Agilent CE C8 column, and Peeke C8SR column. Peeke C8SR showed the best separation efficiency. Different mobile phases and elution programs were also tested. Water (containing 0.1% FA, 1 mM ammonium format) and methanol (containing



0.1% FA, 1 mM ammonium format) was chosen for analysis. Finally, an optimized method for sphingolipids was established as described in “2.3.1”.

#### **4.2 HPLC coupled with FTICRMS**

For the other kinds of lipids, the established HPLC coupled with FTICRMS method in our previous study could detect 44 compounds in one analyze cycle in one hour. These compounds covered diacylglycerol (DG), triacylglycerol (TG), phosphatidylcholine (PC) and phosphatidylethanolamine (PE) (4). The optimization of this method was limiting the analysis time into 30 minutes. The lipid data analyzer (LDA) was used to do the quantification and its library was expanded this time. The chromatography and MS conditions were also optimized. The analysis sequence was improved with the addition of needle washing program after each sample program. So that sample residual on the injection needle and needle blocking were avoided efficiently.

These two methods described above constructed the platform for lipids quantification (Fig. S2).

Table S1 Detailed information of 12 herbs in XXMD

| Chinese name | English name                            | Latin name                        | Family                                      | Used part |
|--------------|-----------------------------------------|-----------------------------------|---------------------------------------------|-----------|
| Fang feng    | Divaricate saposhnikovia root           | Radix Saposhnikoviae              | Saposhnikovia divaricata (Turcz.) Schischk. | Root      |
| Huang qin    | Baical skullcap root                    | Radix Scutellariae                | Scutellaria baicalensis Georgi.             | Root      |
| Shao yao     | Debark peony root                       | Radix Paeoniae Alba               | Paeonia lactiflora Pall.                    | Root      |
| Gan cao      | Liquorice root                          | Radix Glycyrrhizae                | Glycyrrhiza uralensis Fisch.                | Root      |
| Sheng jiang  | Fresh ginger                            | Rhizoma Zingiberis Recens         | Zingiber officinale Rosc.                   | Root      |
| Fang ji      | Mealy fangji root                       | Radix Stephaniae Tetrandrae       | Stephania tetrandra S. Moore.               | Root      |
| Ren shen     | Ginseng                                 | Radix Ginseng                     | Panax ginseng C. A. Mey.                    | Root      |
| Gui zhi      | Cassia twig                             | Ramulus Cinnamomi                 | Cinnamomum cassia Presl.                    | Twig      |
| Xing ren     | Bitter apricot seed                     | Semen Armeniacae Amarum           | Prunus armeniaca L. var. ansu Maxim.        | Seed      |
| Ma huang     | Ephedra                                 | Herba Ephedrae                    | Ephedra sinica Staph.                       | Stem      |
| Chuan xiong  | Sichuan lovage rhizome                  | Rhizoma Ligustici Chuanxiong      | Ligusticum chuanxiong Hort.                 | Root      |
| Fu zi        | Prepared common monkshood branched root | Radix Aconiti Lateralis Preparata | Aconitum carmichaeli Debx.                  | Root      |

**Table S2 Content levels of main component in the active fraction of XXMD (5)**

| Compounds                  | Content (%) | Compounds         | Content (%) |
|----------------------------|-------------|-------------------|-------------|
| Ephedrine                  | 0.107       | Wogonoside        | 2.302       |
| Pseudoephedrine            | 0.297       | Baicalin          | 1.458       |
| Paeoniflorin               | 0.395       | Liquiritigenin    | 0.438       |
| Prim-O-glucosylcimifugin   | 1.207       | Cinnamic acid     | 0.571       |
| Cimicifugin                | 0.408       | Ferulic acid      | 0.511       |
| 5-O-methylvisamminoside    | 0.367       | Chrysin           | 0.355       |
| Baicalin                   | 5.102       | Oroxylin A        | 0.215       |
| Liquiritin                 | 0.220       | Wogonin           | 0.369       |
| Isoliquiritin              | 0.394       | Glycyrrhizic acid | 0.600       |
| Oroxylin A-7-O-glucuronide | 1.932       |                   |             |

**Table S3 Segments and ion pairs**

| Segments      |               | 2           |       |            |                  |
|---------------|---------------|-------------|-------|------------|------------------|
| Compound Name | Precursor Ion | Product Ion | Dwell | Fragmentor | Collision Energy |
| HexSph 18:1   | 462.1         | 282.2       | 60    | 130        | 21               |
| dhSph 18:0-1P | 382.1         | 284.2       | 60    | 80         | 20               |
| Sph 18:1-1P   | 380.3         | 264.1       | 60    | 70         | 15               |
| Sph 17:1-1P   | 366.1         | 250         | 60    | 70         | 15               |
| dhSph 18:0    | 302.1         | 284.2       | 60    | 120        | 5                |
| Sph 18:1      | 300.3         | 282.3       | 60    | 90         | 5                |
| Sph 17:1      | 286.1         | 268.1       | 60    | 100        | 7                |
| Segments      |               | 3           |       |            |                  |
| Compound Name | Precursor Ion | Product Ion | Dwell | Fragmentor | Collision Energy |
| HexCer 16:1   | 698.2         | 264.2       | 45    | 140        | 36               |
| HexCer 14:0   | 672.2         | 264.1       | 45    | 150        | 36               |
| HexCer 14:1   | 670.2         | 264.1       | 45    | 150        | 36               |
| HexCer 12:0   | 644.2         | 264.1       | 45    | 150        | 36               |
| HexCer 12:1   | 642.2         | 264.1       | 45    | 150        | 36               |
| HexCer 8:0    | 588.2         | 264.2       | 45    | 100        | 36               |
| Cer 8:0-1P    | 506.1         | 264.2       | 45    | 80         | 25               |
| Cer 12:0      | 482.4         | 264.1       | 45    | 140        | 20               |

| Cer 10:0      | 454.2         | 264.1       | 45    | 140        | 15               |
|---------------|---------------|-------------|-------|------------|------------------|
| dhCer 8:0     | 428.2         | 266.2       | 45    | 150        | 25               |
| Segments      | 4             |             |       |            |                  |
| Compound Name | Precursor Ion | Product Ion | Dwell | Fragmentor | Collision Energy |
| HexCer 22:1   | 782.3         | 264.2       | 15    | 155        | 39               |
| HexCer 20:0   | 756.3         | 264.2       | 15    | 155        | 39               |
| HexCer 20:1   | 754.3         | 264.2       | 15    | 150        | 39               |
| HexCer 18:0   | 728.2         | 264.2       | 15    | 150        | 39               |
| HexCer 18:1   | 726.1         | 264.2       | 15    | 160        | 36               |
| HexCer 16:0   | 700.2         | 264.2       | 15    | 140        | 36               |
| HexCer 16:1   | 698.2         | 264.2       | 15    | 140        | 36               |
| HexCer 14:0   | 672.2         | 264.1       | 15    | 150        | 36               |
| HexCer 14:1   | 670.2         | 264.1       | 15    | 150        | 36               |
| Cer 16:0-1P   | 618.1         | 264.1       | 15    | 110        | 30               |
| Cer 16:1-1P   | 616.1         | 264.1       | 15    | 110        | 30               |
| dhCer 20:0    | 596.3         | 266.2       | 15    | 145        | 30               |
| Cer 14:0-1P   | 590.2         | 264.1       | 15    | 105        | 25               |
| Cer 14:1-1P   | 588.2         | 264.1       | 15    | 105        | 25               |
| dhCer 18:0    | 568.2         | 266.2       | 15    | 140        | 25               |
| Cer 18:0      | 566.4         | 264.2       | 15    | 150        | 25               |

| dhCer 18:1      | 566.2         | 266.2       | 15    | 140        | 30               |
|-----------------|---------------|-------------|-------|------------|------------------|
| Cer 18:1        | 564.4         | 264.1       | 15    | 130        | 20               |
| Cer 12:0-1P     | 562.1         | 264.1       | 15    | 100        | 26               |
| Cer 12:1-1P     | 560.1         | 264.1       | 15    | 100        | 26               |
| Cer (17:1) 18:0 | 552.4         | 250.1       | 15    | 130        | 30               |
| dhCer 16:0      | 540.2         | 266.2       | 15    | 160        | 30               |
| Cer 16:0        | 538.4         | 264.2       | 15    | 140        | 20               |
| Cer 14:0        | 510.4         | 264.1       | 15    | 120        | 20               |
| Cer 12:0        | 482.4         | 264.1       | 15    | 140        | 20               |
| <hr/>           |               |             |       |            |                  |
| Segments        | 5             |             |       |            |                  |
| <hr/>           |               |             |       |            |                  |
| Compound Name   | Precursor Ion | Product Ion | Dwell | Fragmentor | Collision Energy |
| <hr/>           |               |             |       |            |                  |
| HexCer 24:0     | 812.2         | 264.1       | 11    | 160        | 36               |
| HexCer 24:1     | 810.2         | 264.1       | 11    | 160        | 36               |
| HexCer 22:0     | 784.3         | 264.2       | 11    | 160        | 39               |
| HexCer 22:1     | 782.3         | 264.2       | 11    | 155        | 39               |
| HexCer 20:0     | 756.3         | 264.2       | 11    | 155        | 39               |
| HexCer 20:1     | 754.3         | 264.2       | 11    | 150        | 39               |
| Cer 22:1-1P     | 700.2         | 264.1       | 11    | 125        | 35               |
| Cer 26:1        | 676.5         | 264.1       | 11    | 140        | 35               |
| dhCer 20:1-1P   | 674.2         | 266.2       | 11    | 120        | 25               |

|                 |       |       |    |     |    |
|-----------------|-------|-------|----|-----|----|
| Cer 20:0-1P     | 674.2 | 264.1 | 11 | 120 | 35 |
| Cer 20:1-1P     | 672.2 | 264.1 | 11 | 120 | 35 |
| dhCer 24:0      | 652.3 | 266.2 | 11 | 180 | 30 |
| Cer 24:0        | 650.4 | 264.1 | 11 | 140 | 30 |
| dhCer 24:1      | 650.3 | 266.2 | 11 | 150 | 35 |
| Cer 24:1        | 648.3 | 264.1 | 11 | 140 | 30 |
| dhCer 18:0-1P   | 648.2 | 266.2 | 11 | 120 | 25 |
| dhCer 18:1-1P   | 646.2 | 266.2 | 11 | 120 | 25 |
| Cer 18:0-1P     | 646.2 | 264.1 | 11 | 120 | 35 |
| Cer 18:1-1P     | 644.2 | 264.1 | 11 | 120 | 35 |
| Cer (17:1) 24:1 | 634.5 | 250.1 | 11 | 140 | 10 |
| dhCer 22:0      | 624.3 | 266.1 | 11 | 140 | 30 |
| Cer 22:0        | 622.3 | 264.1 | 11 | 140 | 25 |
| dhCer 16:0-1P   | 620.2 | 266.2 | 11 | 115 | 25 |
| dhCer 16:1-1P   | 618.2 | 266.2 | 11 | 110 | 25 |
| Cer 16:0-1P     | 618.1 | 264.1 | 11 | 110 | 30 |
| Cer 16:1-1P     | 616.1 | 264.1 | 11 | 110 | 30 |
| dhCer 20:0      | 596.3 | 266.2 | 11 | 145 | 30 |
| Cer 20:0        | 594.4 | 264.1 | 11 | 140 | 25 |
| Cer 14:0-1P     | 590.2 | 264.1 | 11 | 105 | 25 |

| dhCer 18:0      | 568.2         | 266.2       | 11    | 140        | 25               |
|-----------------|---------------|-------------|-------|------------|------------------|
| Cer 18:0        | 566.4         | 264.2       | 11    | 150        | 25               |
| dhCer 18:1      | 566.2         | 266.2       | 11    | 140        | 30               |
| Cer (17:1) 18:0 | 552.4         | 250.1       | 11    | 130        | 30               |
| <hr/>           |               |             |       |            |                  |
| Segments        | 6             |             |       |            |                  |
| <hr/>           |               |             |       |            |                  |
| Compound Name   | Precursor Ion | Product Ion | Dwell | Fragmentor | Collision Energy |
| <hr/>           |               |             |       |            |                  |
| dhCer 28:0-1P   | 788.3         | 266.2       | 15    | 135        | 36               |
| Cer 28:0-1P     | 786.4         | 264.1       | 15    | 135        | 35               |
| dhCer 28:1-1P   | 786.3         | 266.2       | 15    | 145        | 35               |
| Cer 28:1-1P     | 784.4         | 264.1       | 15    | 125        | 35               |
| dhCer 26:0-1P   | 760.2         | 266.2       | 15    | 125        | 35               |
| Cer 26:0-1P     | 758.4         | 264.1       | 15    | 125        | 35               |
| dhCer 26:1-1P   | 758.2         | 266.2       | 15    | 125        | 35               |
| Cer 26:1-1P     | 756.1         | 264.1       | 15    | 125        | 35               |
| dhCer 24:0-1P   | 732.2         | 266.2       | 15    | 125        | 25               |
| Cer 24:0-1P     | 730.3         | 264.1       | 15    | 125        | 35               |
| dhCer 24:1-1P   | 730.2         | 266.2       | 15    | 125        | 25               |
| Cer 24:1-1P     | 728.2         | 264.1       | 15    | 125        | 35               |
| dhCer 22:0-1P   | 704.2         | 266.2       | 15    | 125        | 25               |
| Cer 22:0-1P     | 702.3         | 264.1       | 15    | 130        | 35               |



|               |       |       |    |     |    |
|---------------|-------|-------|----|-----|----|
| dhCer 22:1-1P | 702.2 | 266.2 | 15 | 125 | 25 |
| Cer 22:1-1P   | 700.3 | 264.1 | 15 | 130 | 32 |
| Cer 26:0      | 678.5 | 264.1 | 15 | 140 | 35 |
| Cer 26:1      | 676.5 | 264.1 | 15 | 140 | 35 |
| dhCer 20:0-1P | 676.2 | 266.2 | 15 | 120 | 25 |
| dhCer 20:1-1P | 674.2 | 266.2 | 15 | 120 | 25 |
| dhCer 24:0    | 652.3 | 266.2 | 15 | 180 | 30 |
| Cer 24:0      | 650.4 | 264.1 | 15 | 140 | 30 |
| dhCer 24:1    | 650.3 | 266.2 | 15 | 150 | 35 |
| dhCer 18:0-1P | 648.2 | 266.2 | 15 | 120 | 25 |
| dhCer 18:1-1P | 646.2 | 266.2 | 15 | 120 | 25 |
| dhCer 16:0-1P | 620.2 | 266.2 | 15 | 115 | 25 |

---

**Table S4 Metabolites after oral administration**

| No.            | RT<br>(min) | M+H      | Error  | Proposed<br>formula                            | MS <sup>n</sup>                                                                                | Name             | Parent<br>structure | Metabolism | No. |
|----------------|-------------|----------|--------|------------------------------------------------|------------------------------------------------------------------------------------------------|------------------|---------------------|------------|-----|
| 1              | 23.9        | 293.1018 | -0.165 | C <sub>15</sub> H <sub>17</sub> O <sub>6</sub> | MS <sup>2</sup> [293]: 275(100), 233(64);<br>MS <sup>3</sup> [233]: 233(100)                   | Cimifugin-methyl | H1                  | - Methyl   | M1  |
| 2              | 25.07       | 293.1018 | -0.165 | C <sub>15</sub> H <sub>17</sub> O <sub>6</sub> | MS <sup>2</sup> [293]: 275(100), 221(48);<br>MS <sup>3</sup> [275]: 257(65), 221(100)          | Cimifugin-methyl | H1                  | - Methyl   | M2  |
| 3 <sup>a</sup> | 20.03       | 307.1174 | -0.215 | C <sub>16</sub> H <sub>19</sub> O <sub>6</sub> | MS <sup>2</sup> [307]: 289(83), 235(100);<br>MS <sup>3</sup> [235]: 207(100)                   | Cimifugin        | H1                  | -          | H1  |
| 4              | 16.08       | 321.0964 | -0.48  | C <sub>16</sub> H <sub>17</sub> O <sub>7</sub> | MS <sup>2</sup> [321]: 303(92), 273(22), 249(100);<br>MS <sup>3</sup> [249]: 231(55), 221(100) | Cimifugin+O-2H   | H1                  | +O-2H      | M3  |
| 5              | 17.48       | 323.1128 | 0.27   | C <sub>16</sub> H <sub>19</sub> O <sub>7</sub> | MS <sup>2</sup> [323]: 247(100);<br>MS <sup>3</sup> [247]: 232(100)                            | Cimifugin+O      | H1                  | +O         | M4  |

|    |       |          |        |                                                 |                                                                                                                          |                                |    |       |     |
|----|-------|----------|--------|-------------------------------------------------|--------------------------------------------------------------------------------------------------------------------------|--------------------------------|----|-------|-----|
| 6  | 17.46 | 469.1698 | -0.693 | C <sub>22</sub> H <sub>29</sub> O <sub>11</sub> | MS <sup>2</sup> [469]: 307(100);                                                                                         | Cimifugin+glucosyl             | H1 | +Glu  | M5  |
| 7  | 17.61 | 483.149  | -0.703 | C <sub>22</sub> H <sub>27</sub> O <sub>12</sub> | MS <sup>3</sup> [307]: 289(88), 235(100)<br>MS <sup>2</sup> [483]: 307(100);<br>MS <sup>3</sup> [307]: 289(85), 235(100) | Cimifugin+glucuronidation      | H1 | +GluA | M6  |
| 8  | 33.5  | 257.0809 | 0.064  | C <sub>15</sub> H <sub>13</sub> O <sub>4</sub>  | MS <sup>2</sup> [257]: 239(97), 211(34), 147(100), 137(83);<br>MS <sup>3</sup> [147]: 119(100)                           | Liquiritigenin                 | H2 | -     | H2  |
| 9  | 24.43 | 419.1339 | 0.241  | C <sub>21</sub> H <sub>23</sub> O <sub>9</sub>  | MS <sup>2</sup> [419]: 257(100);<br>MS <sup>3</sup> [257]: 239(100), 147(99)                                             | Liquiritigenin+glucosyl        | H2 | +Glu  | M9  |
| 10 | 19.23 | 433.1128 | -0.224 | C <sub>21</sub> H <sub>21</sub> O <sub>10</sub> | MS <sup>2</sup> [433]: 257(100);<br>MS <sup>3</sup> [257]: 239(100), 147(99), 137(87)                                    | Liquiritigenin+glucuronidation | H2 | +GluA | M10 |
| 11 | 25.35 | 433.1128 | -0.224 | C <sub>21</sub> H <sub>21</sub> O <sub>10</sub> | MS <sup>2</sup> [433]: 257(100);<br>MS <sup>3</sup> [257]: 239(88), 147(89), 137(100)                                    | Liquiritigenin+glucuronidation | H2 | +GluA | M11 |
| 12 | 27.41 | 431.0983 | 0.848  | C <sub>21</sub> H <sub>19</sub> O <sub>10</sub> | MS <sup>2</sup> [431]: 255(100);<br>MS <sup>3</sup> [255]: 255(100), 237(90), 153(55)                                    | Chrysin+glucuronidation        | H3 | +GluA | M12 |
| 13 | 19.9  | 549.1598 | -0.468 | C <sub>26</sub> H <sub>29</sub> O <sub>13</sub> | MS <sup>2</sup> [549]: 531(100), 411(81);                                                                                | Chrysin+arabinose+             | H3 | +Ara  | M13 |

|                 |       |          |        |                                                 |                                                                                                                                            |                                        |    |               |     |
|-----------------|-------|----------|--------|-------------------------------------------------|--------------------------------------------------------------------------------------------------------------------------------------------|----------------------------------------|----|---------------|-----|
|                 |       |          |        |                                                 | MS <sup>3</sup> [531]: 513(100), 411(44)                                                                                                   | glucosyl                               |    | +Glu          |     |
| 14              | 26.8  | 447.0918 | -0.388 | C <sub>21</sub> H <sub>19</sub> O <sub>11</sub> | MS <sup>2</sup> [447]: 271(100);                                                                                                           | Baicalein+glucuronidation              | H4 | +GluA         | M14 |
| 15              | 28.03 | 447.0918 | -0.388 | C <sub>21</sub> H <sub>19</sub> O <sub>11</sub> | MS <sup>2</sup> [271]: 271(100), 253(22)<br>MS <sup>2</sup> [447]: 411(100), 271(60);<br>MS <sup>3</sup> [271]: 271(50), 253(100), 169(20) | Baicalein+glucuronidation              | H4 | +GluA         | M15 |
| 16              | 21.75 | 609.1434 | -1.612 | C <sub>27</sub> H <sub>29</sub> O <sub>16</sub> | MS <sup>2</sup> [609]: 447(100);<br>MS <sup>3</sup> [447]: 271(100)                                                                        | Baicalein+glucosyl+<br>glucuronidation | H4 | +Glu<br>+GluA | M16 |
| 17              | 21.68 | 623.1234 | -0.876 | C <sub>27</sub> H <sub>27</sub> O <sub>17</sub> | MS <sup>2</sup> [623]: 447(100);<br>MS <sup>3</sup> [447]: 271(100)                                                                        | Baicalein+2 glucuronidation            | H4 | +2 GluA       | M17 |
| 18              | 28.43 | 461.1079 | 0.062  | C <sub>22</sub> H <sub>21</sub> O <sub>11</sub> | MS <sup>2</sup> [461]: 285(100);<br>MS <sup>3</sup> [285]: 270(100)                                                                        | Wogonin+glucuronidation                | H5 | +GluA         | M18 |
| 19              | 22.17 | 637.1395 | -0.427 | C <sub>28</sub> H <sub>29</sub> O <sub>17</sub> | MS <sup>2</sup> [637]: 285(100);<br>MS <sup>3</sup> [285]: 270(100)                                                                        | Wogonin+2 glucuronidation              | H5 | +2 GluA       | M19 |
| 20 <sup>a</sup> | 25.52 | 291.1231 | 0.399  | C <sub>16</sub> H <sub>19</sub> O <sub>5</sub>  | MS <sup>2</sup> [291]: 219(100)                                                                                                            | 5-O-methylvisamminol                   | H6 | - Glu         | M20 |
| 21              | 33.7  | 277.1074 | 0.35   | C <sub>15</sub> H <sub>17</sub> O <sub>5</sub>  | MS <sup>2</sup> [277]: 259(100);<br>MS <sup>3</sup> [259]: 217(100), 205(95)                                                               | Hamaudol                               | H7 | -             | H7  |

|    |       |          |        |                                                 |                                                                                                                 |                                                           |     |                |     |
|----|-------|----------|--------|-------------------------------------------------|-----------------------------------------------------------------------------------------------------------------|-----------------------------------------------------------|-----|----------------|-----|
| 22 | 26.86 | 439.1602 | 0.326  | C <sub>21</sub> H <sub>27</sub> O <sub>10</sub> | MS <sup>2</sup> [439]: 277(100);                                                                                | Hamaudol+glucosyl                                         | H7  | +Glu           | M21 |
| 23 | 27.25 | 461.1079 | 0.062  | C <sub>22</sub> H <sub>21</sub> O <sub>11</sub> | MS <sup>3</sup> [277]: 259(100), 205(55)<br>MS <sup>2</sup> [461]: 285(100);<br>MS <sup>3</sup> [285]: 270(100) | Oroxylside                                                | H8  | -              | H8  |
| 24 | 38.71 | 315.0864 | 0.085  | C <sub>17</sub> H <sub>15</sub> O <sub>6</sub>  | MS <sup>2</sup> [315]: 300(100), 282(62), 199(9);<br>MS <sup>3</sup> [300]: 285(79), 282(100)                   | 5,7-Dimethoxy-4',6-dihydroxy<br>flavone                   | H9  | -              | H9  |
| 25 | 28.66 | 491.1186 | 0.197  | C <sub>23</sub> H <sub>23</sub> O <sub>12</sub> | MS <sup>2</sup> [491]: 315(100);<br>MS <sup>3</sup> [315]: 300(100), 285(18), 169(0.15)                         | 5,7-Dimethoxy-4',6-dihydroxy<br>flavone + Glucuronidation | H9  | +GluA          | M22 |
| 26 | 47.31 | 471.3479 | 1.013  | C <sub>30</sub> H <sub>47</sub> O <sub>4</sub>  | MS <sup>2</sup> [471]: 453(60), 435(26), 425(100);<br>MS <sup>3</sup> [425]: 407(100)                           | Enoxolone                                                 | H10 | -              | H10 |
| 27 | 24.69 | 507.1138 | 0.582  | C <sub>23</sub> H <sub>23</sub> O <sub>13</sub> | MS <sup>2</sup> [507]: 331(100);<br>MS <sup>3</sup> [331]: 316(100), 183(9), 169(51)                            | Jaceosidin+glucuronidation                                | H11 | - Glu<br>+GluA | M7  |
| 28 | 25.09 | 477.102  | -0.753 | C <sub>22</sub> H <sub>21</sub> O <sub>12</sub> | MS <sup>2</sup> [477]: 301(100);<br>MS <sup>3</sup> [301]: 286(100)                                             | Hispidulin+glucuronidation                                | H12 | +GluA          | M8  |

---

<sup>a</sup> Metabolites detected in both the brain tissue and plasm

**Table S5 Potential biomarker and their change tendency**

| Plasma                  |          |                     |          | Brain tissue            |          |                     |          |
|-------------------------|----------|---------------------|----------|-------------------------|----------|---------------------|----------|
| Model vs Sham operation |          | Model vs Model+XXMD |          | Model vs Sham operation |          | Model vs Model+XXMD |          |
| 38                      |          | 73                  |          | 52                      |          | 100                 |          |
| Name                    | tendency | Name                | tendency | Name                    | tendency | Name                | tendency |
| dhCer24: 0              | ↑        | Cer16: 0-1P         | ↑        | Cer24: 1                | ↑        | Cer18: 0-1P         | ↑        |
| HexCer8: 0              | ↑        | Cer24: 0            | ↓        | LPC 16: 0               | ↓        | Cer18: 1            | ↑        |
| Sph18: 1                | ↑        | DG 34: 2            | ↓        | LPC 18: 2               | ↓        | Cer22: 0-1P         | ↓        |
| LPC 14: 0               | ↓        | DG 44: 12           | ↓        | LPC 18: 3               | ↓        | Cer22: 1-1P         | ↓        |
| LPC 16: 1               | ↓        | LPC 16: 0           | ↓        | LPC 22: 6               | ↓        | Cer24: 0-1P         | ↓        |
| LPC 18: 3               | ↓        | LPC 16: 1           | ↓        | LPE 16: 0               | ↓        | Cer24: 1            | ↑        |
| LPC 18O: 0              | ↑        | LPC 18: 0           | ↓        | LPE 18: 1               | ↓        | Cer24: 1-1P         | ↓        |
| LPC 20: 3               | ↓        | LPC 18: 1           | ↓        | LPE 20: 3               | ↓        | Cer26: 0-1P         | ↓        |
| LPC 20: 5               | ↓        | LPC 18: 2           | ↓        | LPE 20: 4               | ↓        | dhCer16: 0-1P       | ↓        |
| LPC 22: 5               | ↓        | LPC 18: 3           | ↓        | LPE 20O: 0              | ↓        | dhCer18: 0-1P       | ↓        |
| LPE 18: 1               | ↓        | LPC 20: 0           | ↓        | PC 32: 0                | ↓        | dhCer24: 0-1P       | ↓        |
| PC 32: 0                | ↓        | LPC 20: 4           | ↓        | PC 34: 0                | ↓        | dhCer24: 1-1P       | ↓        |
| PC 34: 3                | ↓        | LPC 20: 5           | ↓        | PC 36: 0                | ↓        | dhCer24: 1          | ↑        |
| PC 36: 1                | ↓        | LPC 22: 6           | ↓        | PC 36: 5                | ↓        | dhCer26: 1-1P       | ↓        |
| PC 36: 3                | ↓        | LPE 16: 0           | ↓        | PC 38: 6                | ↓        | Sph18: 1-1P         | ↓        |
| PC 38: 5                | ↓        | LPE 18: 1           | ↑        | PC 40: 4                | ↓        | Sph18: 1            | ↓        |
| PC 38: 6                | ↓        | PC 36: 5            | ↓        | PC 40: 6                | ↓        | DG 38: 4            | ↓        |
| PC 38: 8                | ↓        | PC 38: 2            | ↓        | PC 40: 8                | ↓        | DG 40: 10           | ↓        |
| PC 40: 10               | ↓        | PC 40: 8            | ↓        | PE 22: 0                | ↓        | DG 42: 10           | ↓        |
| PC 40: 7                | ↓        | PE 22: 0            | ↑        | PE 35: 1                | ↓        | DG 44: 10           | ↓        |
| PE 22: 0                | ↓        | PE 39: 6            | ↑        | PE 35: 2                | ↓        | DG 44: 11           | ↓        |
| PE 35: 1                | ↓        | PE 40: 4            | ↑        | PE 36O: 3               | ↓        | LPC 22: 6           | ↑        |
| PE 35: 2                | ↓        | PE 40: 6            | ↑        | PE 36P: 1               | ↓        | LPE 16: 0           | ↑        |
| PE 36: 2                | ↓        | PE 41: 5            | ↑        | PE 38: 4                | ↓        | LPE 18: 1           | ↑        |
| PE 36: 4                | ↓        | PI 34: 2            | ↑        | PE 38: 6                | ↓        | LPE 20: 3           | ↑        |
| PE 38: 1                | ↓        | PI 34P: 3           | ↑        | PE 38O: 3               | ↓        | LPE 20: 4           | ↑        |
| PE 39: 5                | ↓        | PI 36: 5            | ↑        | PE 39: 0                | ↓        | LPE 22: 1           | ↑        |
| PE 40: 6                | ↓        | PI 40: 6            | ↑        | PE 39: 5                | ↓        | PC 34: 2            | ↓        |
| PE 40O: 4               | ↓        | PI 40: 7            | ↑        | PE 40: 6                | ↓        | PC 34: 4            | ↓        |

|           |   |           |   |            |   |           |   |
|-----------|---|-----------|---|------------|---|-----------|---|
| PE 41: 5  | ↓ | PS 36P: 1 | ↑ | PE 40: 7   | ↓ | PC 36: 3  | ↓ |
| SM 24d: 1 | ↓ | SM 22: 0  | ↓ | PE 40O: 5  | ↓ | PC 36O: 2 | ↓ |
| SM 24d: 4 | ↓ | SM 24: 1  | ↓ | PE 41: 5   | ↓ | PC 36P: 3 | ↓ |
| SM 26: 1  | ↓ | SM 24d: 1 | ↓ | PE 42P: 2  | ↓ | PC 38: 1  | ↓ |
| TG 56: 5  | ↓ | SM 26: 1  | ↓ | PI 40: 7   | ↓ | PC 38O: 1 | ↓ |
| TG 56: 6  | ↓ | SM 26d: 1 | ↓ | PS 38: 6   | ↓ | PC 40: 5  | ↓ |
| TG 56: 7  | ↓ | TG 34P: 1 | ↓ | TG 50: 2   | ↑ | PE 22: 0  | ↑ |
| TG 56: 8  | ↓ | TG 52: 1  | ↓ | TG 50: 3   | ↑ | PE 31: 0  | ↑ |
| TG 58: 8  | ↓ | TG 52: 2  | ↓ | TG 52: 4   | ↑ | PE 34P: 1 | ↑ |
|           |   | TG 52: 3  | ↓ | TG 52: 5   | ↑ | PE 35: 1  | ↑ |
|           |   | TG 52: 4  | ↓ | TG 54: 3   | ↑ | PE 36: 0  | ↑ |
|           |   | TG 52P: 0 | ↓ | TG 54: 4   | ↑ | PE 36O: 3 | ↑ |
|           |   | TG 52P: 1 | ↓ | TG 54: 5   | ↑ | PE 36P: 1 | ↑ |
|           |   | TG 54: 0  | ↓ | TG 54: 7   | ↑ | PE 38: 4  | ↑ |
|           |   | TG 54: 1  | ↓ | TG 56: 4   | ↑ | PE 38: 6  | ↑ |
|           |   | TG 54: 2  | ↓ | TG 56: 5   | ↑ | PE 38O: 3 | ↑ |
|           |   | TG 54: 3  | ↓ | TG 56: 6   | ↑ | PE 38P: 4 | ↑ |
|           |   | TG 54: 4  | ↓ | TG 56: 7   | ↑ | PE 39: 5  | ↑ |
|           |   | TG 54: 5  | ↓ | TG 58: 2   | ↑ | PE 39: 6  | ↑ |
|           |   | TG 54: 6  | ↓ | TG 58: 9   | ↑ | PE 40: 4  | ↑ |
|           |   | TG 54P: 1 | ↓ | TG 58P: 11 | ↑ | PE 40: 6  | ↑ |
|           |   | TG 56: 0  | ↓ | TG 60: 12  | ↑ | PE 40: 7  | ↑ |
|           |   | TG 56: 1  | ↓ | TG 60: 2   | ↑ | PE 40P: 2 | ↑ |
|           |   | TG 56: 2  | ↓ |            |   | PE 41: 5  | ↑ |
|           |   | TG 56: 3  | ↓ |            |   | PE 42P: 2 | ↑ |
|           |   | TG 56: 4  | ↓ |            |   | PI 38P: 5 | ↑ |
|           |   | TG 56: 5  | ↓ |            |   | PI 40: 7  | ↑ |
|           |   | TG 56: 6  | ↓ |            |   | PS 40: 6  | ↑ |
|           |   | TG 56: 7  | ↓ |            |   | SM 16: 0  | ↓ |
|           |   | TG 56: 8  | ↓ |            |   | SM 16: 1  | ↓ |
|           |   | TG 58: 0  | ↓ |            |   | SM 18: 1  | ↓ |
|           |   | TG 58: 2  | ↓ |            |   | SM 18d: 1 | ↓ |
|           |   | TG 58: 3  | ↓ |            |   | SM 24: 0  | ↓ |
|           |   | TG 58: 4  | ↓ |            |   | SM 24: 1  | ↓ |
|           |   | TG 58: 5  | ↓ |            |   | SM 24d: 1 | ↓ |

|          |   |            |   |
|----------|---|------------|---|
| TG 58: 6 | ↓ | TG 46: 0   | ↓ |
| TG 60: 2 | ↓ | TG 48: 0   | ↓ |
| TG 60: 3 | ↓ | TG 48: 2   | ↓ |
| TG 60: 4 | ↓ | TG 50: 1   | ↓ |
| TG 60: 5 | ↓ | TG 50: 2   | ↓ |
| TG 62: 2 | ↓ | TG 50: 3   | ↓ |
| TG 62: 3 | ↓ | TG 52: 0   | ↓ |
| TG 62: 4 | ↓ | TG 52: 1   | ↓ |
| TG 62: 7 | ↓ | TG 52: 2   | ↓ |
|          |   | TG 52: 3   | ↓ |
|          |   | TG 52: 4   | ↓ |
|          |   | TG 52: 5   | ↓ |
|          |   | TG 52: 6   | ↓ |
|          |   | TG 52P: 0  | ↓ |
|          |   | TG 54: 0   | ↓ |
|          |   | TG 54: 1   | ↓ |
|          |   | TG 54: 2   | ↓ |
|          |   | TG 54: 3   | ↓ |
|          |   | TG 54: 4   | ↓ |
|          |   | TG 54: 5   | ↓ |
|          |   | TG 54: 6   | ↓ |
|          |   | TG 54: 7   | ↓ |
|          |   | TG 56: 1   | ↓ |
|          |   | TG 56: 2   | ↓ |
|          |   | TG 56: 4   | ↓ |
|          |   | TG 56: 5   | ↓ |
|          |   | TG 56: 6   | ↓ |
|          |   | TG 56: 7   | ↓ |
|          |   | TG 56: 8   | ↓ |
|          |   | TG 58: 1   | ↓ |
|          |   | TG 58: 2   | ↓ |
|          |   | TG 58: 6   | ↓ |
|          |   | TG 58: 9   | ↓ |
|          |   | TG 58P: 11 | ↓ |
|          |   | TG 60: 12  | ↓ |





**Table S6 Standards and internal standards**

| QQQ method     |              |              |                   |                    |    | FT method       |                 |                         |
|----------------|--------------|--------------|-------------------|--------------------|----|-----------------|-----------------|-------------------------|
| Standards      |              | IS-P         | IS-B              | Derivatized        | FA | Standards (QC)  | IS-E            | IS-Q                    |
| HexSph 18: 1   | Cer 10: 0    | dhCer 18: 0  | Sph 17: 1         | Derivatized<br>C6  | FA | PC(18: 0/18: 0) | PS(16: 0/18: 1) | d5-TG<br>ISTD<br>Mix I  |
| dhSph 17: 1    | HexCer 12: 0 | Cer 16: 0-1P | Sph 17: 1-1P      | Derivatized<br>C14 | FA | DG(18: 0/18: 0) | PG(16: 0/18: 1) | d5-DG<br>ISTD<br>Mix II |
| Sph 18: 1      | Cer 12: 0    | Cer 18: 1-1P | dhCer 8: 0        | Derivatized<br>C22 | FA | PS(12: 0/12: 0) | PC(10: 0)       | PC(17: 0/20: 4)         |
| dhSph 18: 0    | Cer 14: 0    | Cer 20: 0    | Cer 8: 0-1P       | Derivatized<br>C28 | FA | PE(12: 0/12: 0) | PE(16: 0/18: 1) | PE(17: 0/20: 4)         |
| dhSph 17: 0-1P | HexCer 16: 0 | HexCer 24: 1 | Cer (17: 1) 18: 0 |                    |    |                 |                 | PS(17: 0/20: 4)         |
| Sph 18: 1-1P   | Cer 12: 0-1P | Cer 22: 0    | Cer (17: 1) 24: 1 |                    |    |                 |                 | PI(17: 0/20: 4)         |
| dhSph 18: 0-1P | HexCer 18: 1 | Cer 24: 1    |                   |                    |    |                 |                 | LPC(17: 1/0: 0)         |
| Cer 4: 0       | Cer 16: 0    | dhCer 24: 1  |                   |                    |    |                 |                 |                         |
| Cer 2: 0-1P    | HexCer 18: 0 | Cer 24: 0    |                   |                    |    |                 |                 |                         |
| Cer 6: 0       | Cer 18: 1    | Cer 26: 1    |                   |                    |    |                 |                 |                         |
| HexCer 8: 0    | dhCer 16: 0  | dhCer 24: 0  |                   |                    |    |                 |                 |                         |
| dhCer 6: 0     | dhCer 18: 1  | Cer 26: 0    |                   |                    |    |                 |                 |                         |
| Cer 8: 0       | Cer 18: 0    |              |                   |                    |    |                 |                 |                         |

Figure S1. The identified compounds and their structures of XXMD by our previous work

(6).

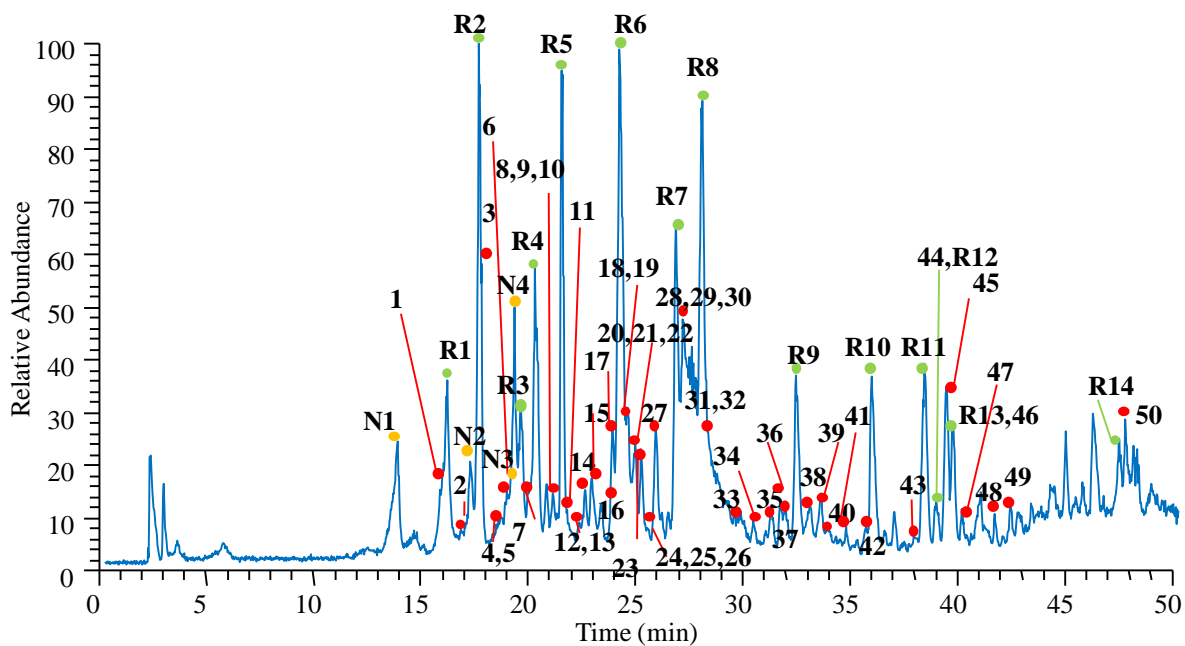

A 50 chemical components (red indication, 1-50) of XXMD was discovered and identified based on the 14 templated compounds (green target recognition, R1-R14). These results showed that this technology has the advantage of rapidly identifying components of Chinese prescription. Notably, the unrelated peak is the compounds whose structures exhibited significant difference from the 14 templated compounds (such as orange indication, N1-4). (6)

Figure S2. The strategy for lipids analysis

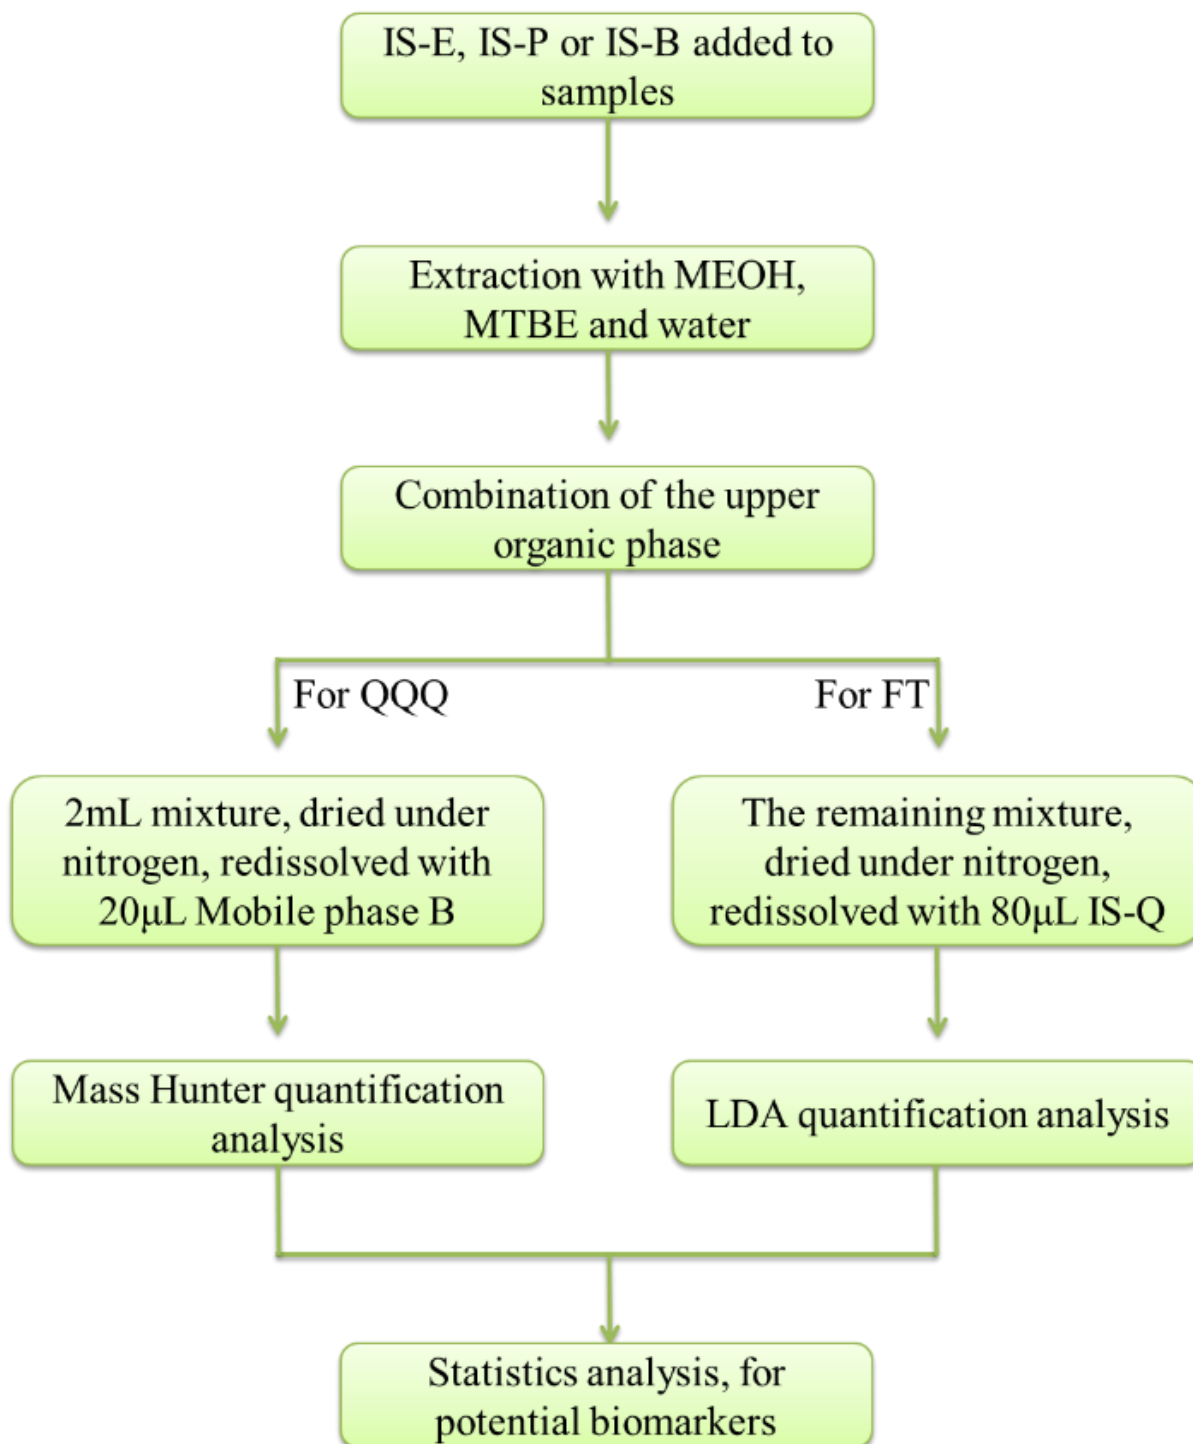

**Figure S3. Light microscopic photographs of pathological section. The first column represented the sham operation group. The second column represented the model group. And the third column represented the model+XXMD group. The first row showed the pictures of Nissle's staining of hippocampal CA1 area which were magnified 200 times. Pictures in the second row were the Nissle's staining of cortex which was magnified 200 times. The third row showed pictures of white matter's KB staining which were magnified 100 times. The forth row were magnified 4 times of the third row.**

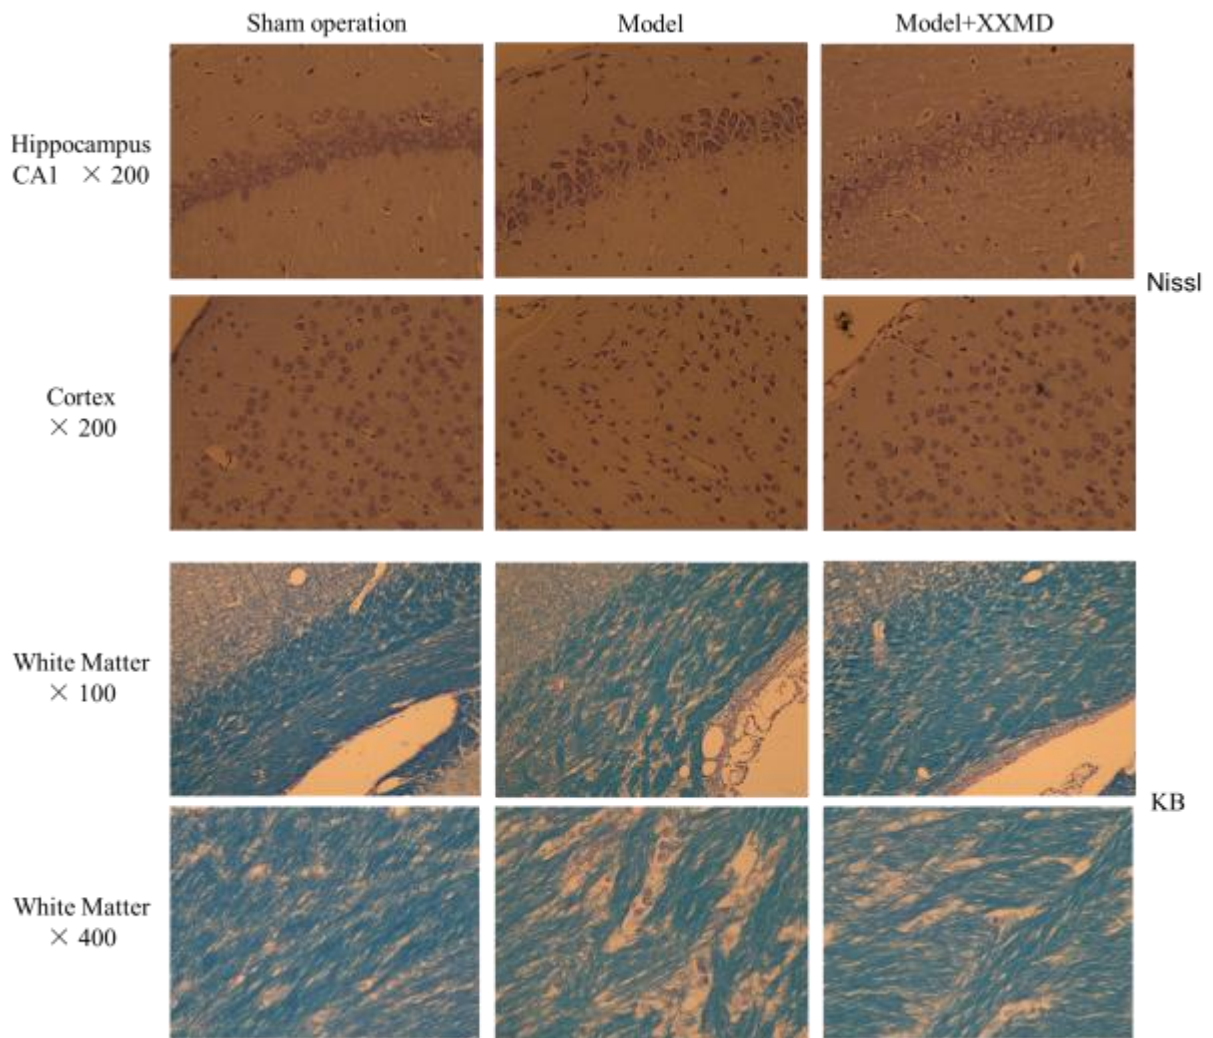

Figure S4. Bar graphs of compounds' concentration detected in plasma. (\* stands for comparison with sham operation group, # stands for comparison with model group. Single symbol means  $P < 0.05$  while double means  $P < 0.01$ ).

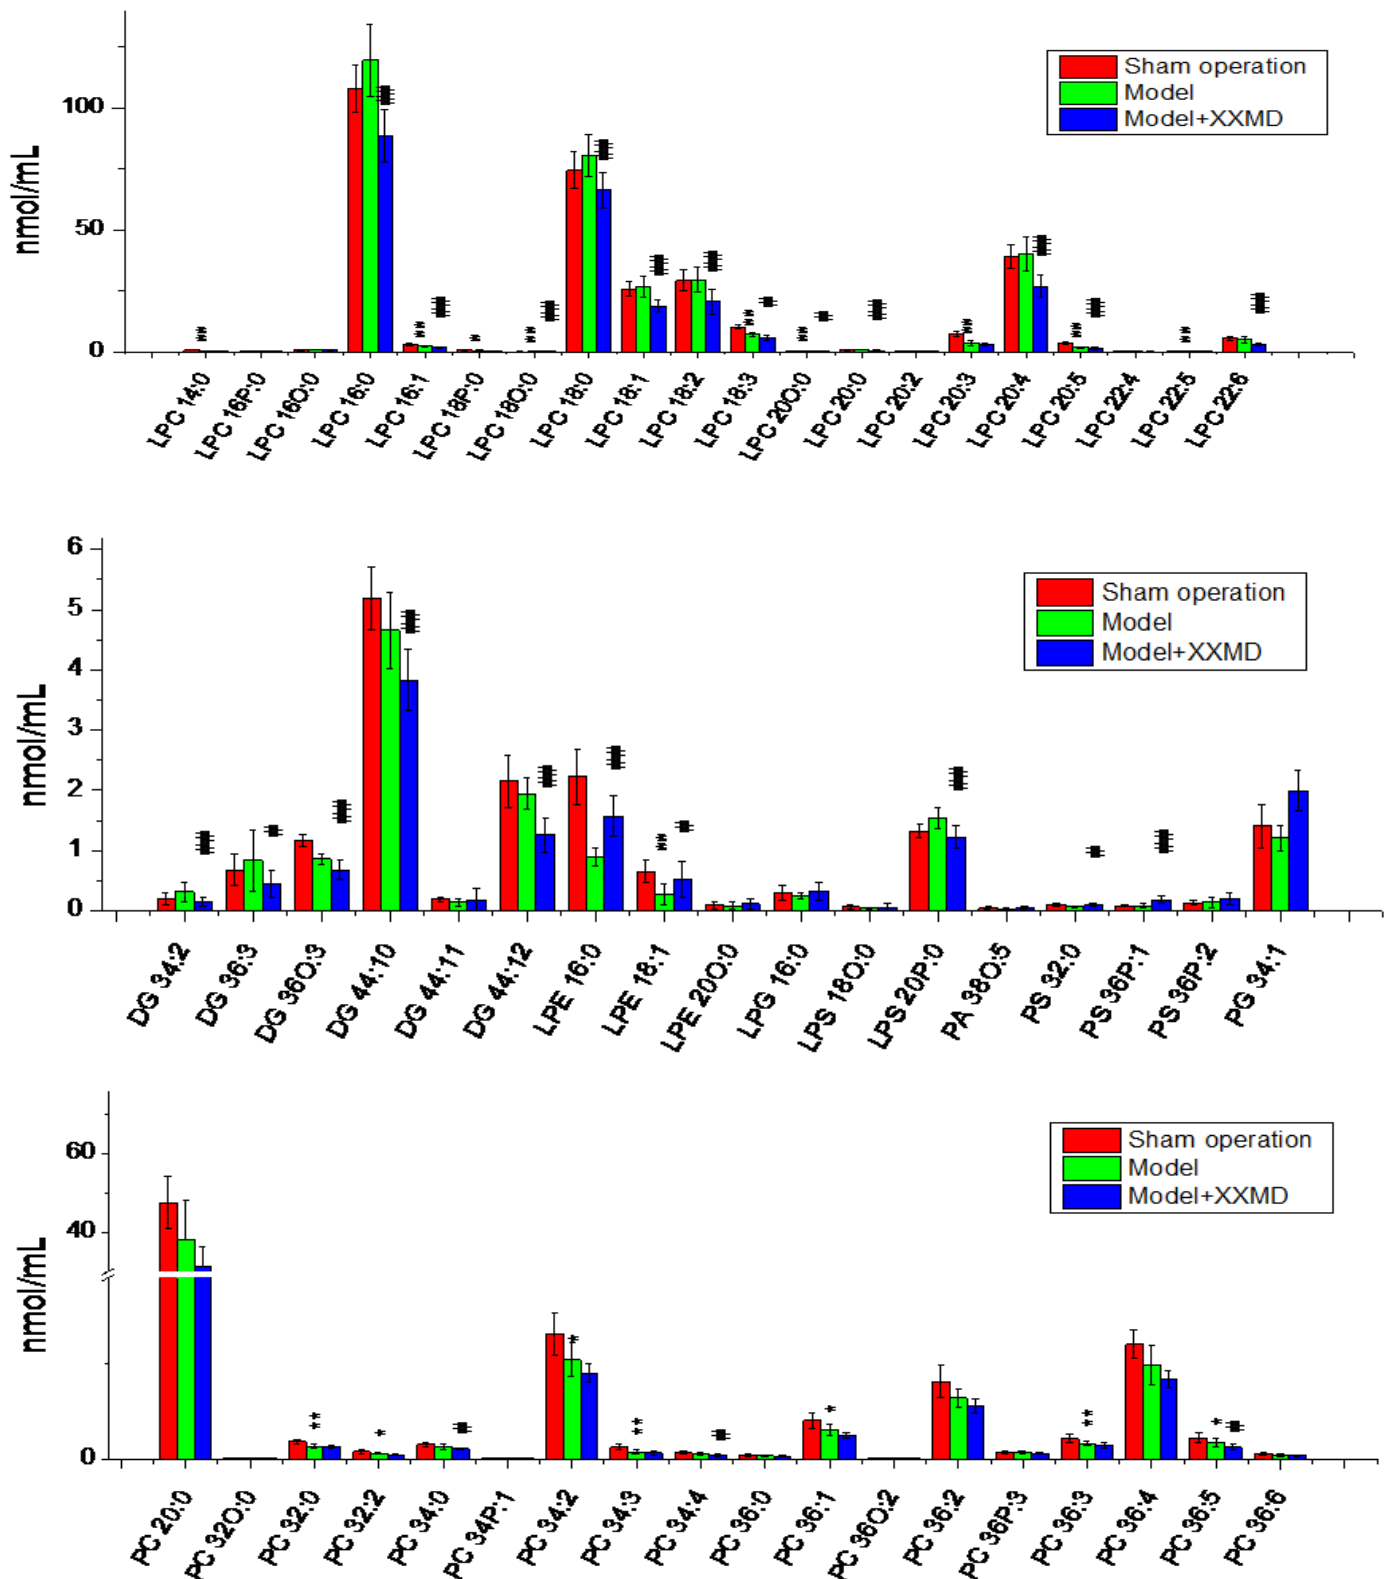

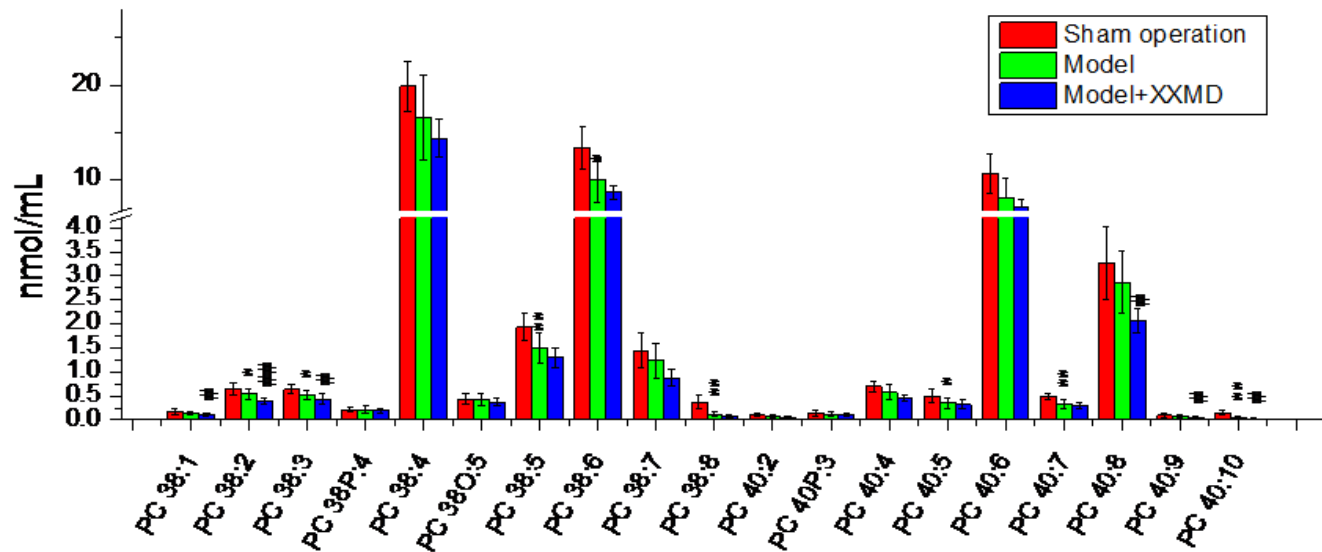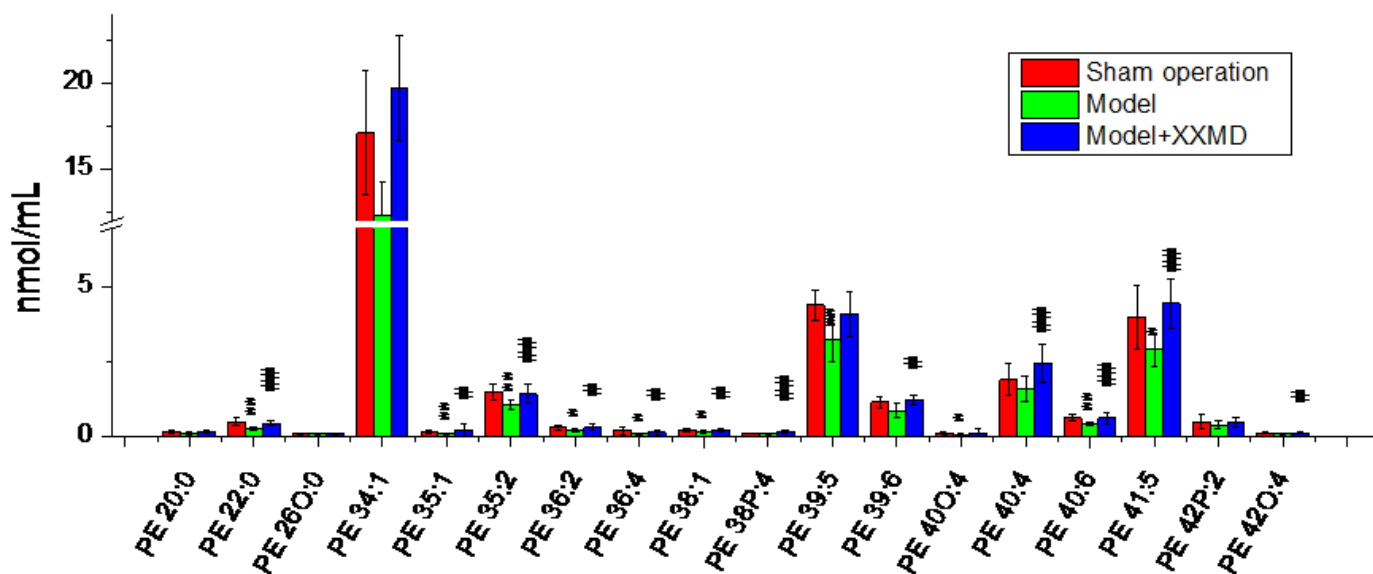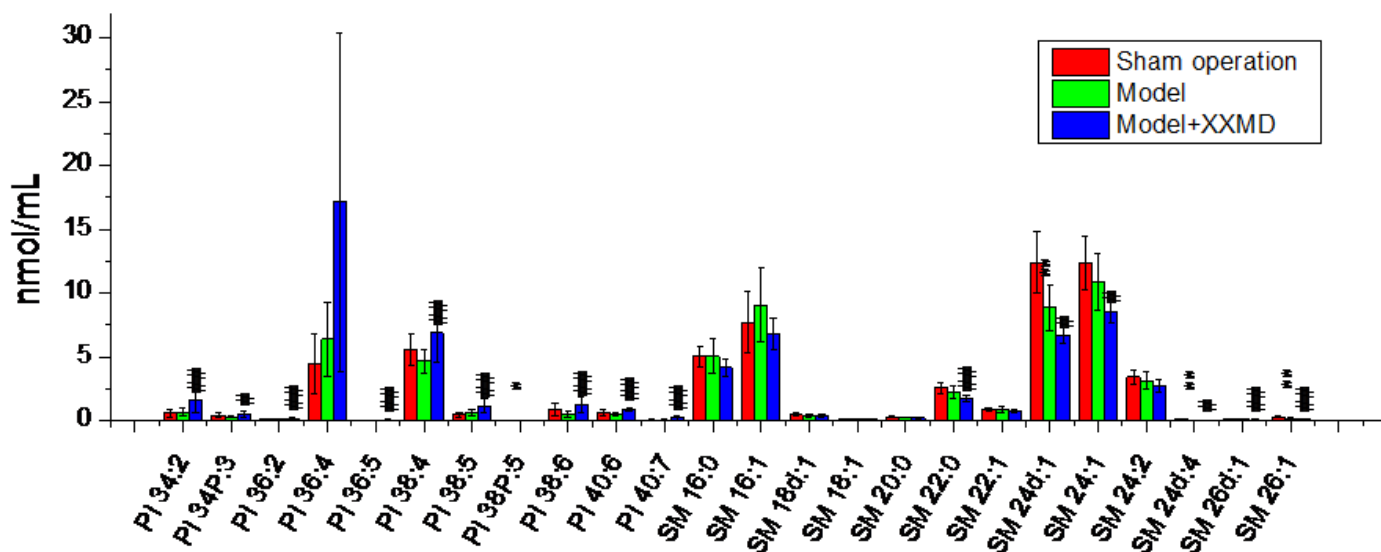

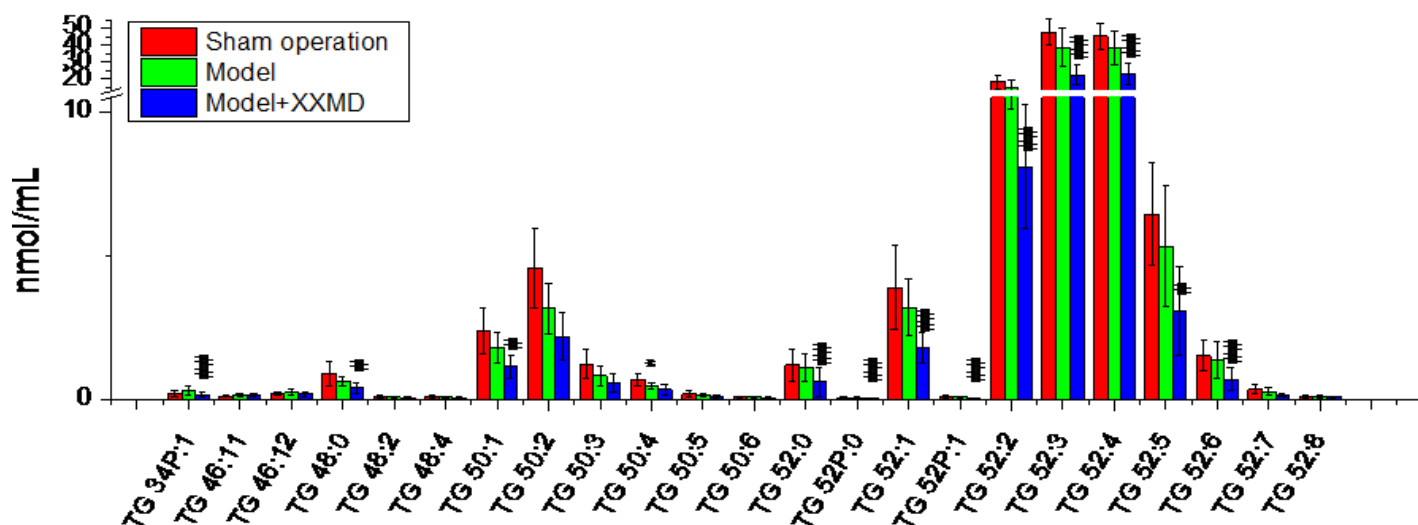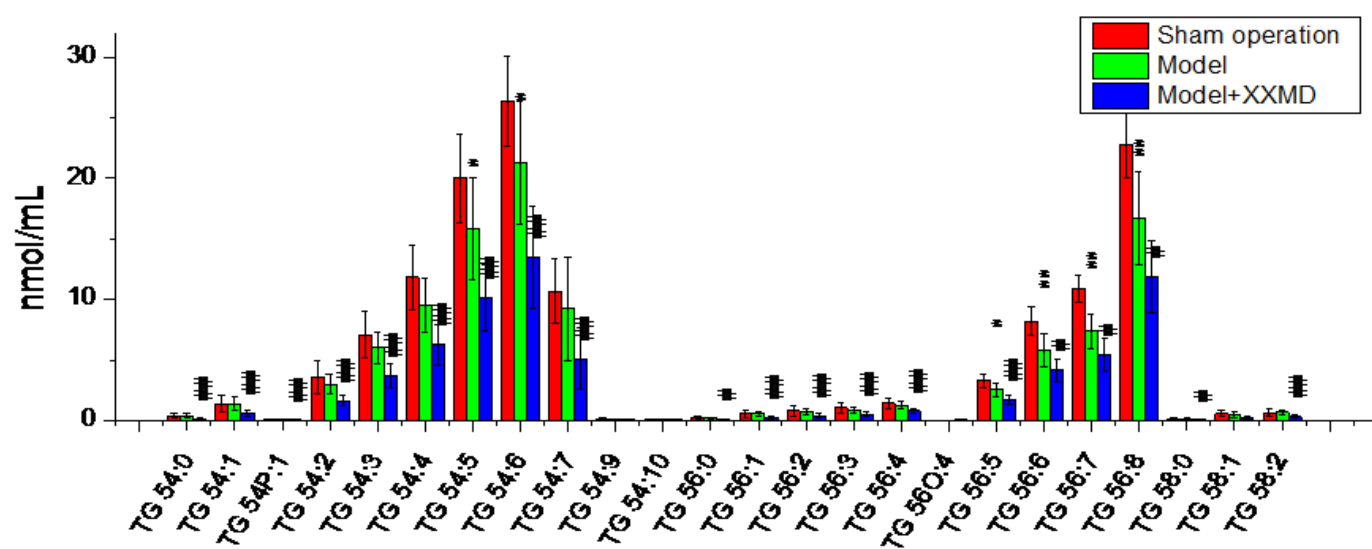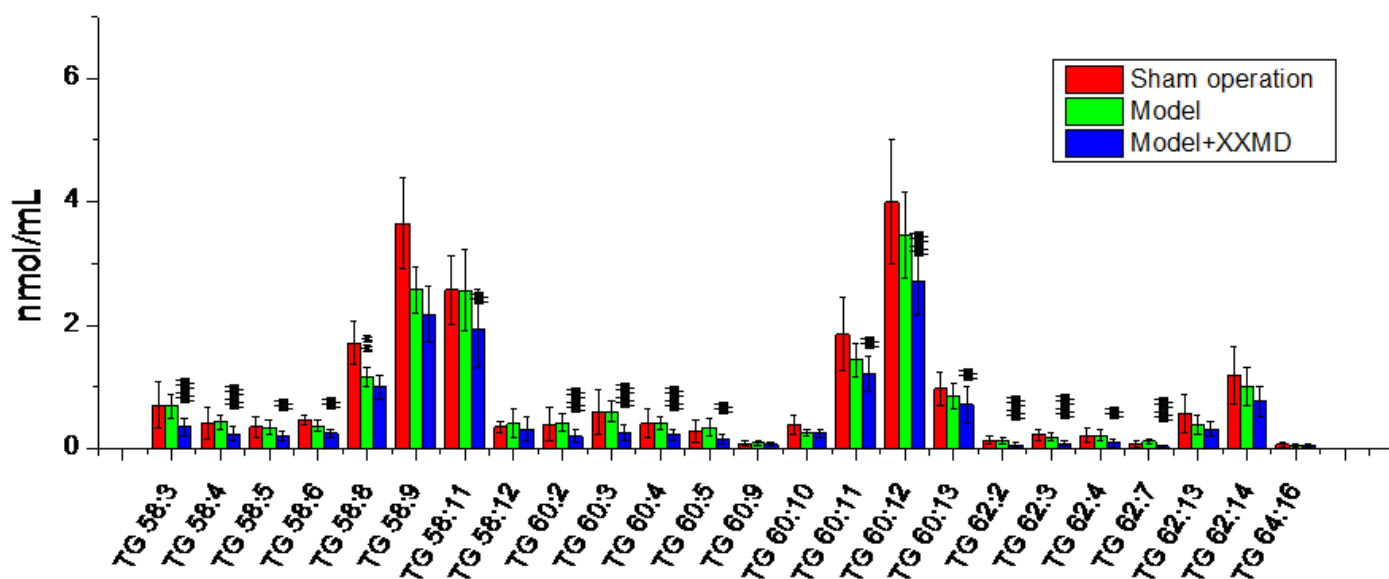



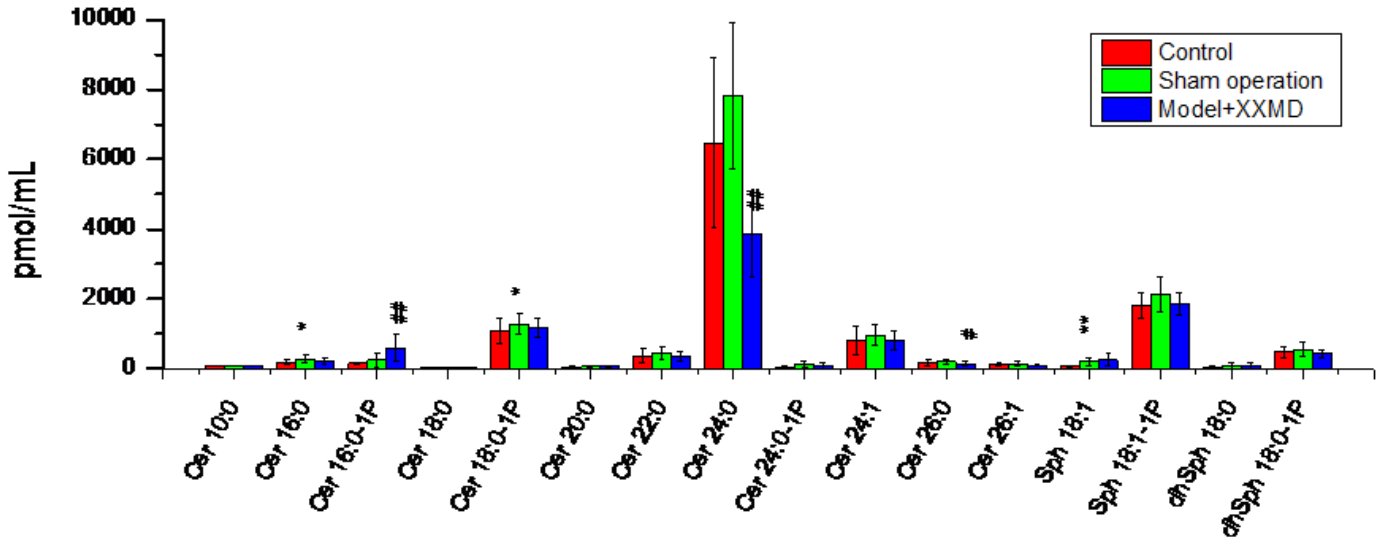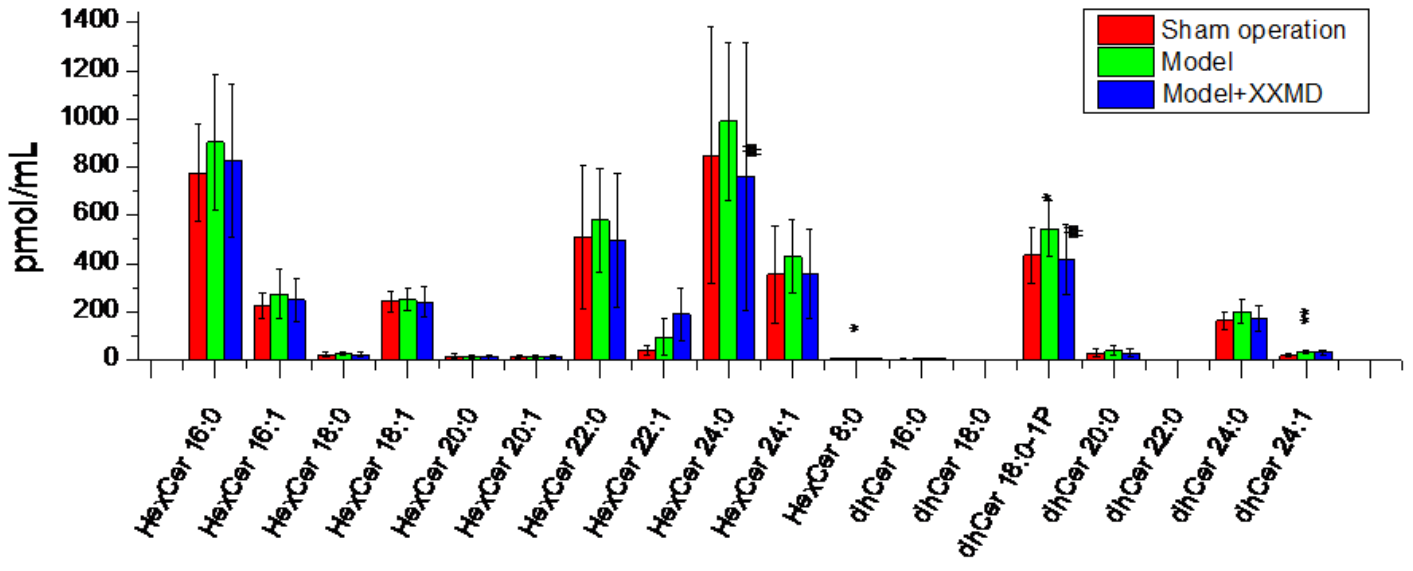

Figure S5. Bar graphs of compounds' concentration detected in brain tissue. (\* stands for comparison with sham operation group, # stands for comparison with model group. Single symbol means  $P < 0.05$  while double means  $P < 0.01$ )

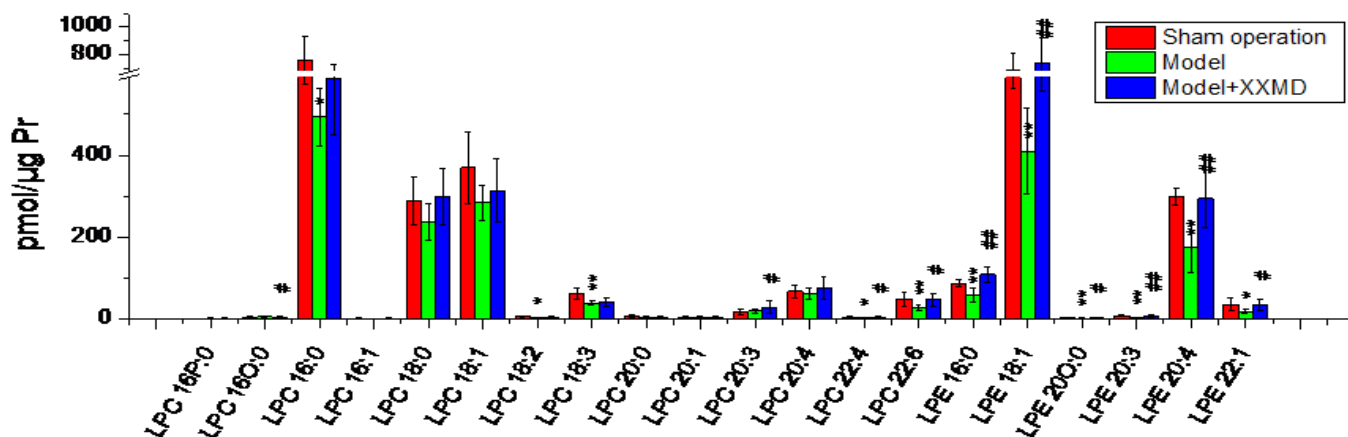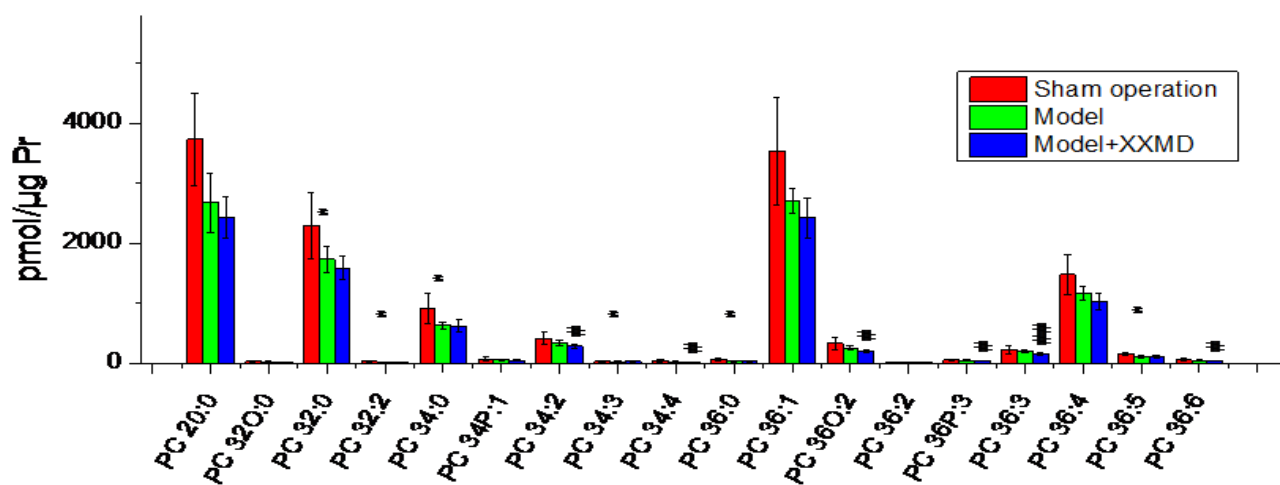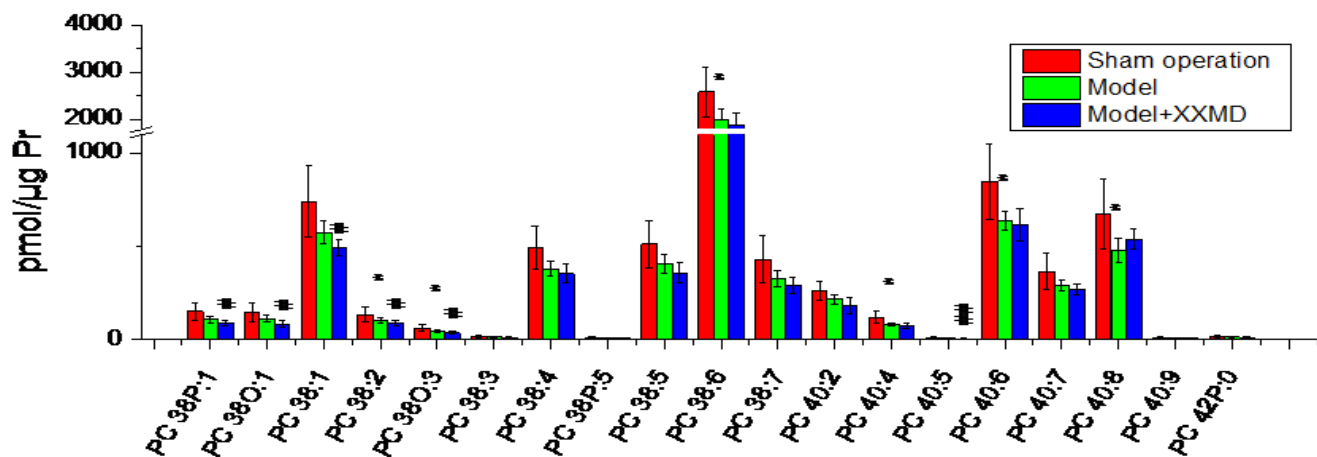

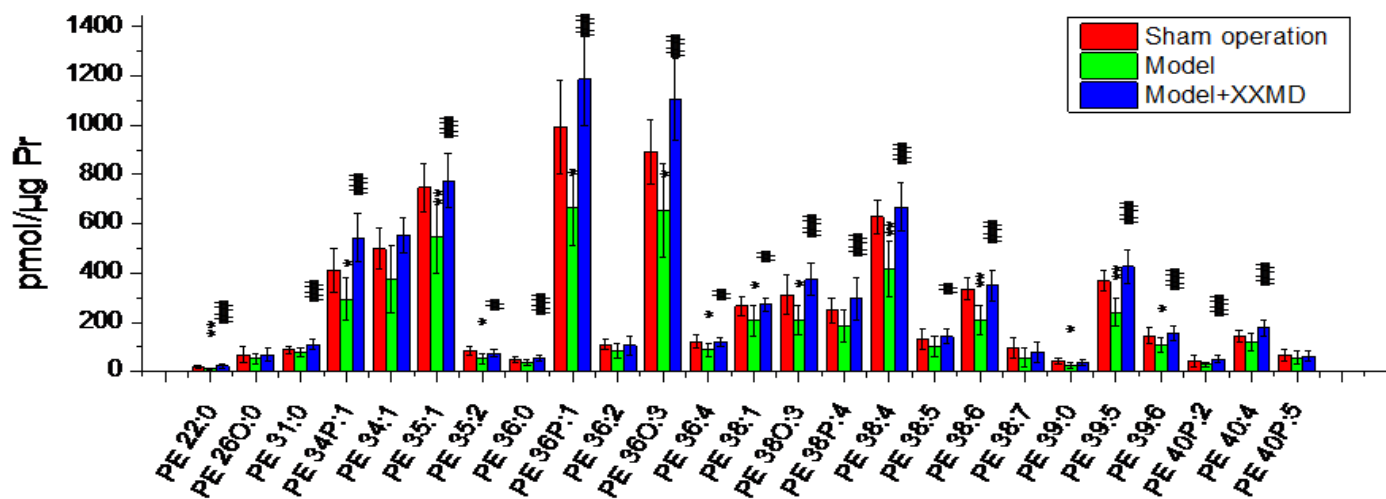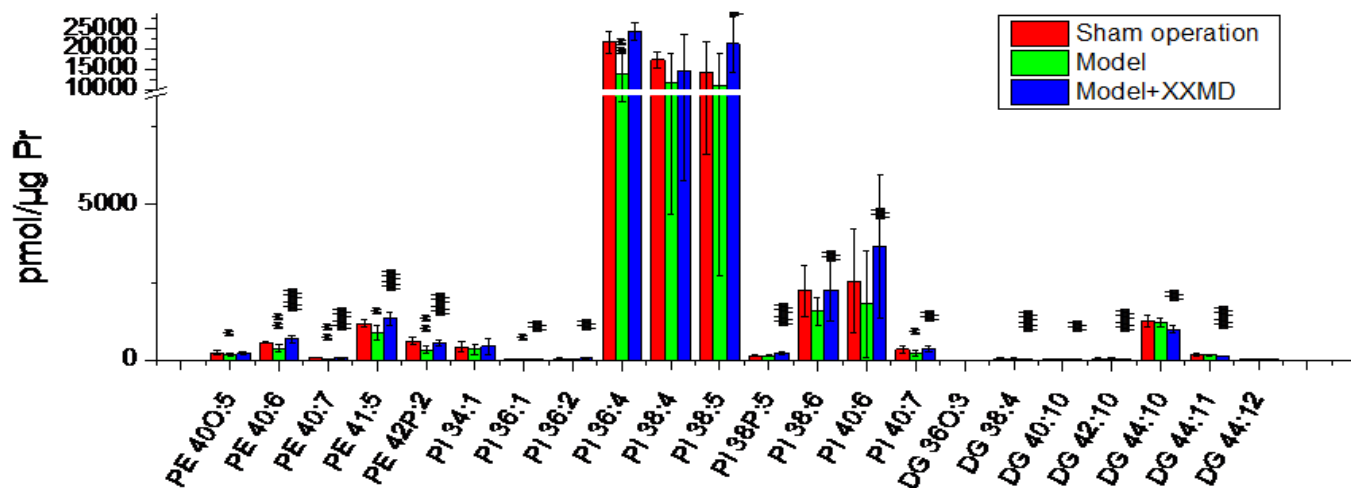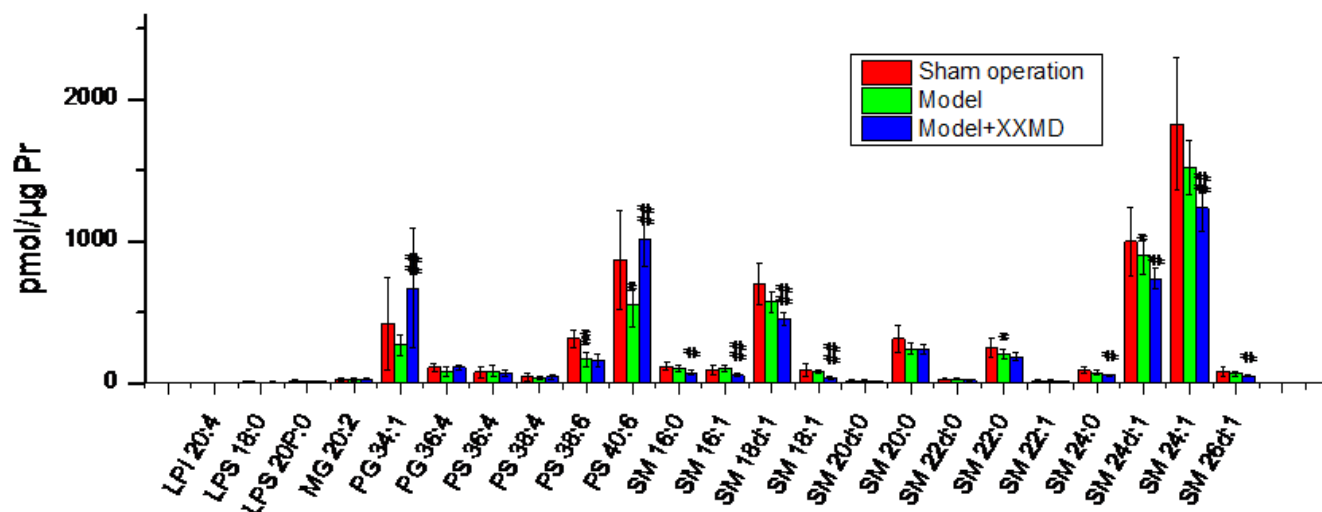

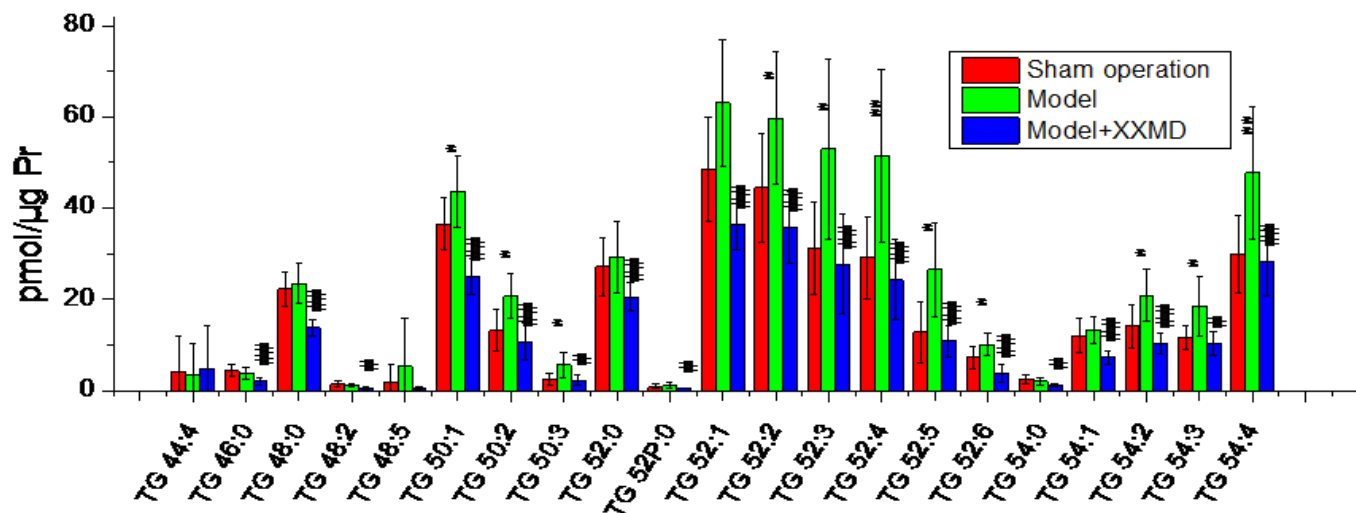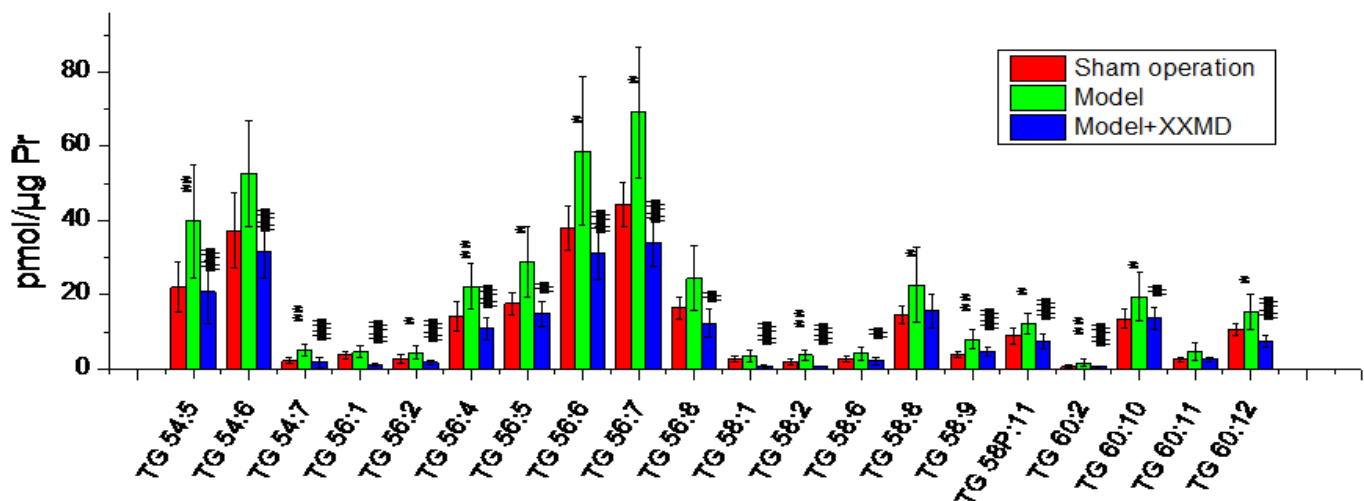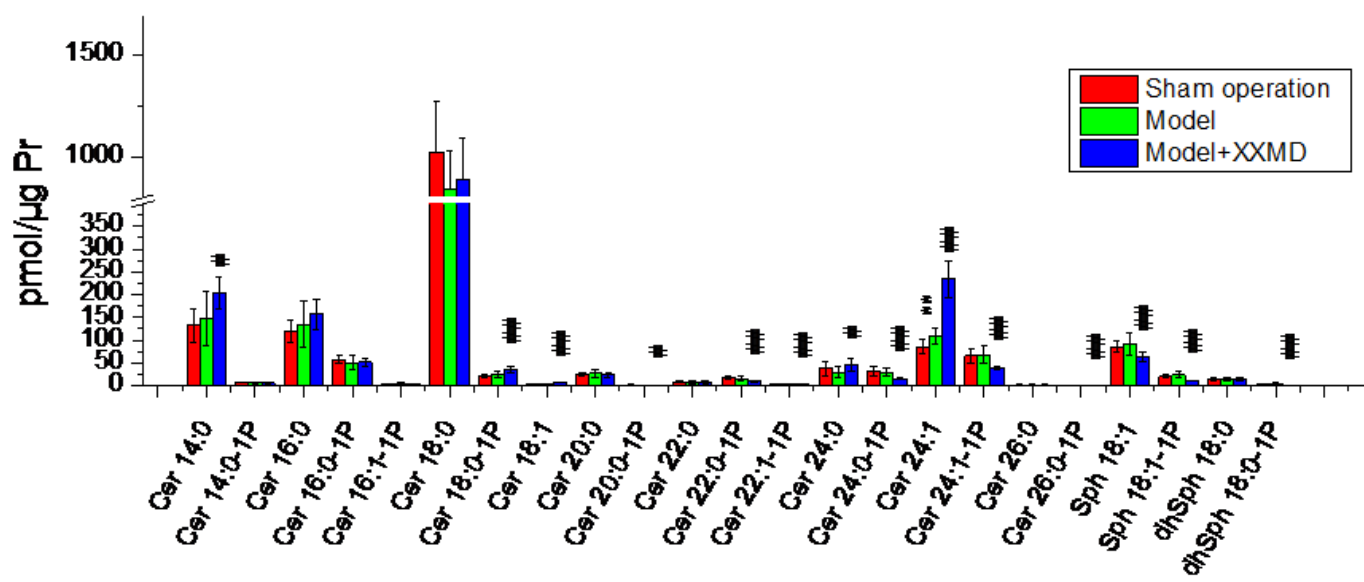

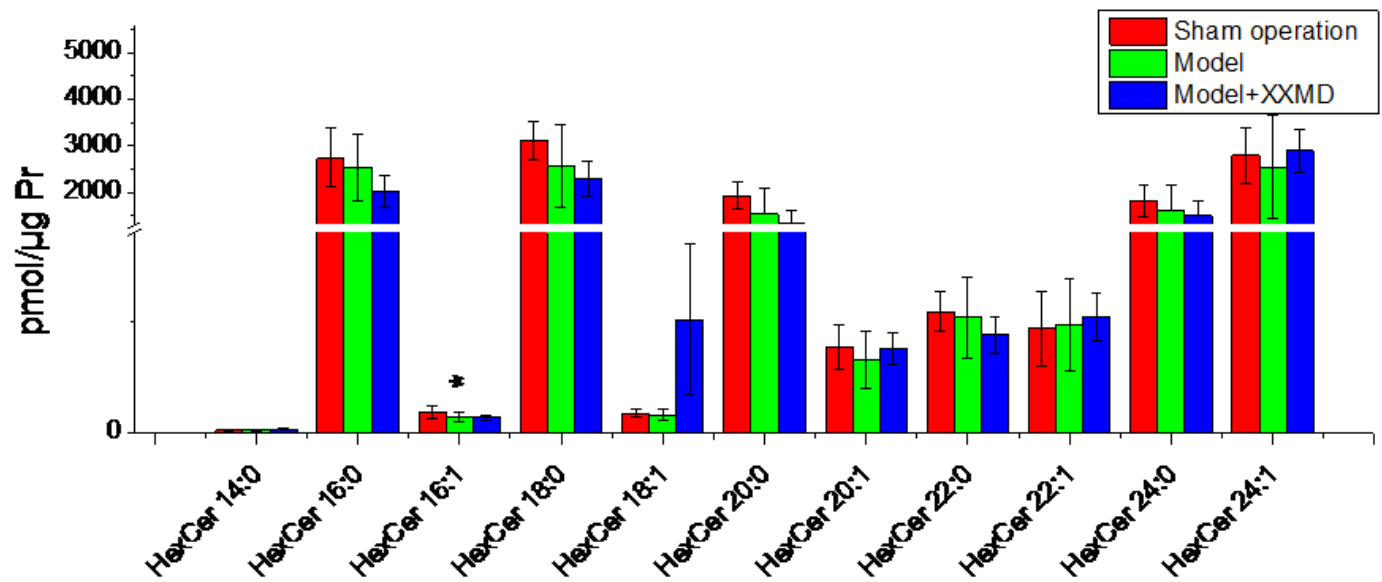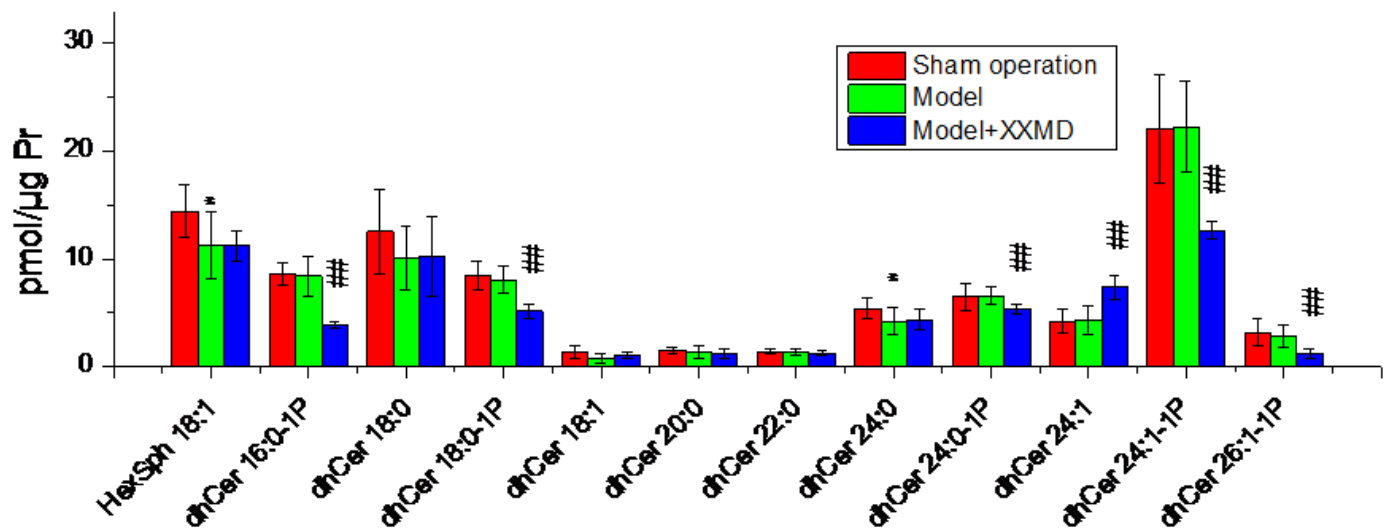

**Figure S6. Structure framework of metabolites of XXMD after oral administration to rats**

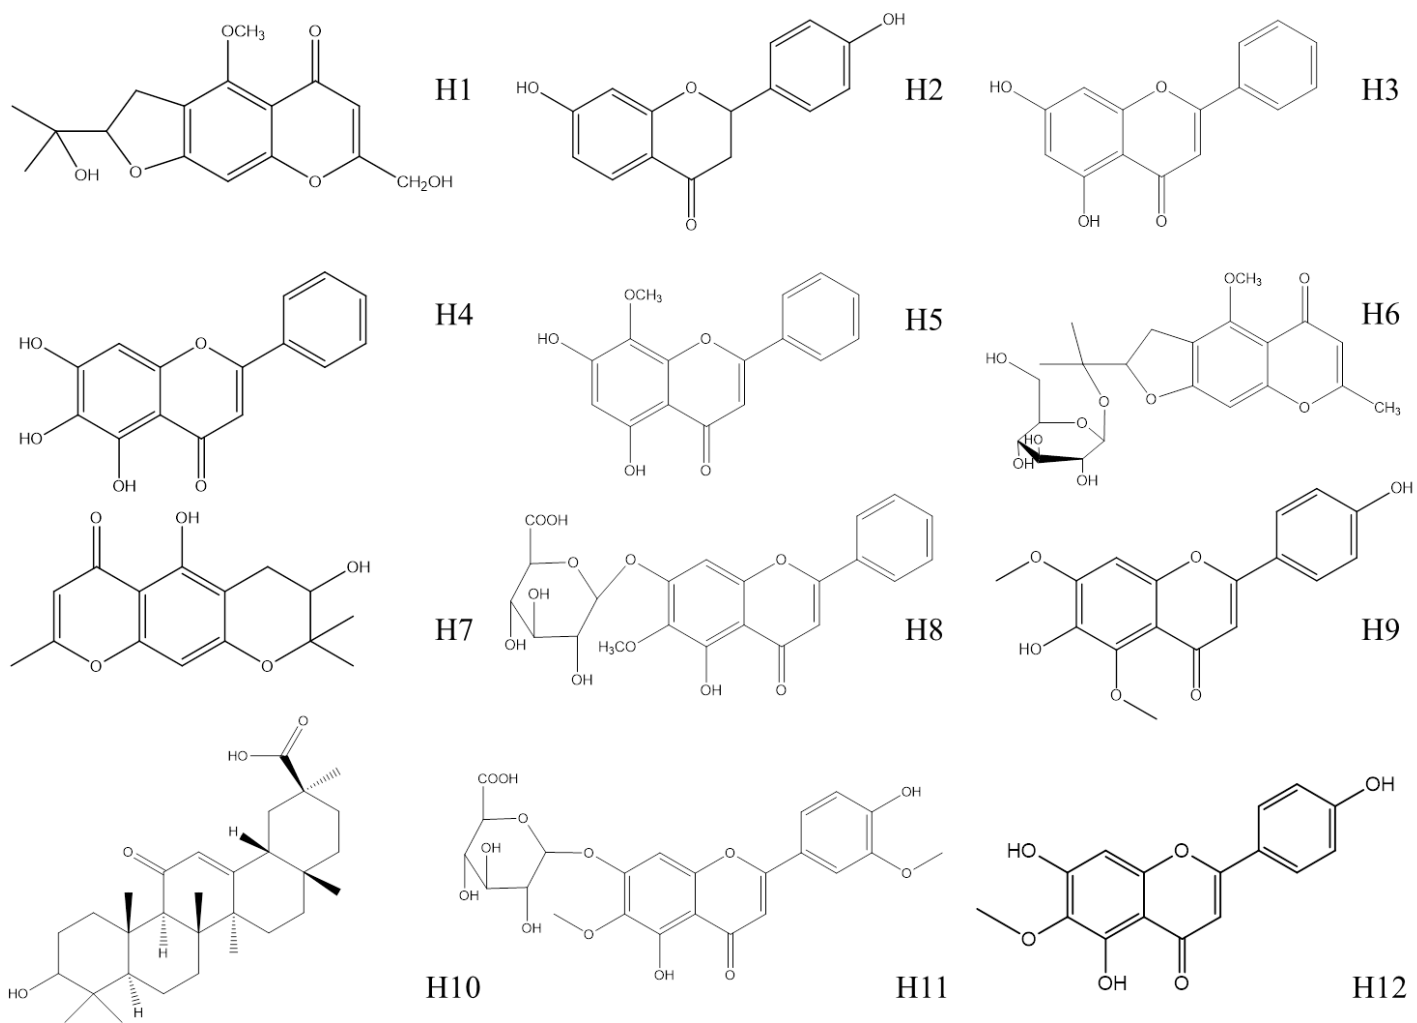

## References

1. Matyash, V., Liebisch, G., Kurzchalia, T. V., Shevchenko, A. & Schwudke, D. 2008. Lipid extraction by methyl- tert- butyl ether for high- throughput lipidomics. *J Lipid Res.* **49**: 1137-1146.
2. Qu, F., Wu, C. S., Hou, J. F., Jin, Y. & Zhang, J. L. 2012. Sphingolipids as new biomarkers for assessment of delayed-type hypersensitivity and response to triptolide. *PLoS One.* **7**: e52454.
3. Fauland, A. *et al.* A comprehensive method for lipid profiling by liquid chromatography-ion cyclotron resonance mass spectrometry. *J Lipid Res.* **52**: 2314-2322.
4. Qu, F. *et al.* 2014. Lipidomic profiling of plasma in patients with chronic hepatitis C infection. *Anal Bioanal Chem.* **405**: 555-564.
5. Wang, C. H., Jia, Z. X., Wang, Z., *et al.* 2016. Pharmacokinetics of 21 active components in focal cerebral ischemic rats after oral administration of the active fraction of Xiao-xu-ming decoction. *J Pharm Biomed Anal.* **122**: 110-117.
6. Wang, C. H., Wu, C. S., Qin, H. L., *et al.* 2014. Rapid discovery and identification of 68 compounds in the active fraction from Xiao-Xu-Ming decoction (XXMD) by HPLC-HRMS and MTSF technique. *Chin Chem Lett.* **25**: 1648-1652.
